# Supplementary material for: Trifluoromethyl substitution enhances photoinduced activity against breast cancer cells but reduces ligand exchange in Ru(ii) complex
Source: PubMed Central journal article supplement — Chem Sci. 2021 Aug 16;12(36):12056–67. doi: 10.1039/d1sc03213e (PMC8457392; doi:10.1039/d1sc03213e), 2021-08-16
Supplement: SC-012-D1SC03213E-s001.pdf [file SC-012-D1SC03213E-s001.pdf]

## *Supporting Information*

### **Trifluoromethyl Substitution Enhances Photoinduced Activity Against Breast Cancer Cells but Reduces Ligand Exchange in Ru(II) Complex**

Austin P. Lanquist,<sup>‡</sup> Sayak Gupta,<sup>†</sup> Kathlyn F. Al-Afyouni,<sup>‡</sup> Malik Al-Afyouni,<sup>‡</sup>  
Jeremy J. Kodanko,<sup>†\*</sup> and Claudia Turro<sup>‡\*</sup>

<sup>‡</sup>*Department of Chemistry and Biochemistry, The Ohio State University, Columbus, OH 43210*

<sup>†</sup>*Department of Chemistry, Wayne State University, Detroit, MI 48208*

| <b><u>Table of Contents</u></b>                                   | <b><u>Page Number</u></b> |
|-------------------------------------------------------------------|---------------------------|
| NMR Data . . . . .                                                | S2                        |
| Crystallographic Data . . . . .                                   | S3                        |
| Emission and Excitation Spectra . . . . .                         | S5                        |
| Photolysis Spectra in H <sub>2</sub> O . . . . .                  | S7                        |
| Dark Controls in H <sub>2</sub> O . . . . .                       | S8                        |
| NMR Photolysis in CD <sub>3</sub> CN . . . . .                    | S9                        |
| Quantum Yield vs Phosphine pK <sub>a</sub> . . . . .              | S9                        |
| DFT Optimized Structures and Data from DFT Calculations . . . . . | S10                       |
| DFT Atomic Coordinates . . . . .                                  | S11                       |
| EC <sub>50</sub> Curves . . . . .                                 | S22                       |
| Cell Death Mechanism Studies . . . . .                            | S28                       |

## NMR Data

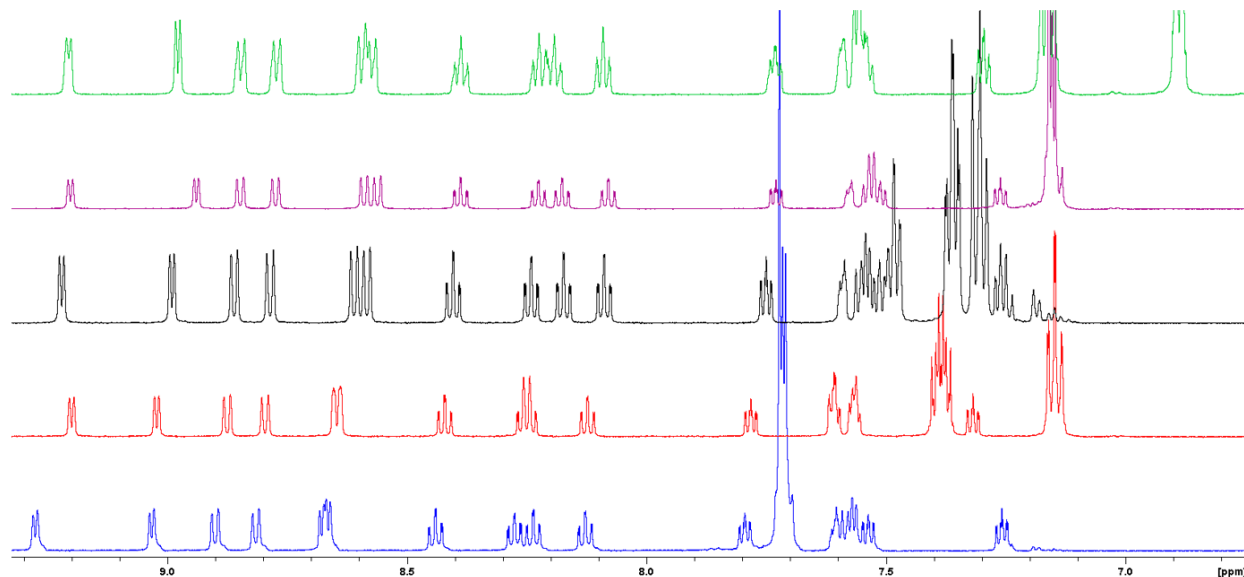

**Figure S1.** <sup>1</sup>H-NMR of the aromatic region of **1** (green), **2** (purple), **3** (black), **4** (red) and **5** (blue) in acetone-d<sub>6</sub>.

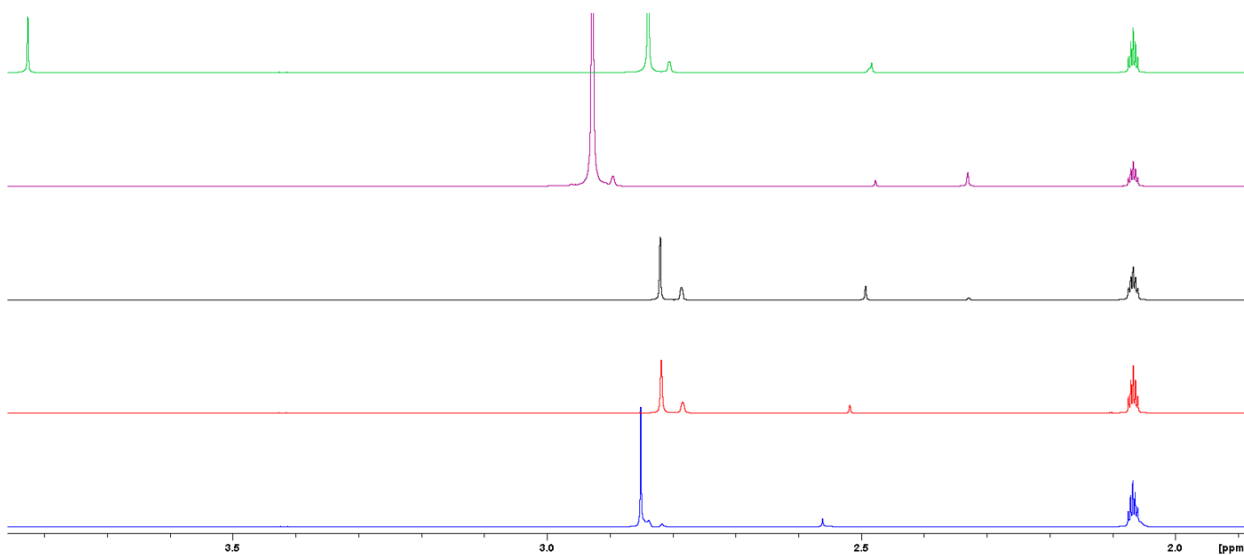

**Figure S2.** <sup>1</sup>H-NMR of the aliphatic region of **1** (green), **2** (purple), **3** (black), **4** (red) and **5** (blue) in acetone-d<sub>6</sub>.

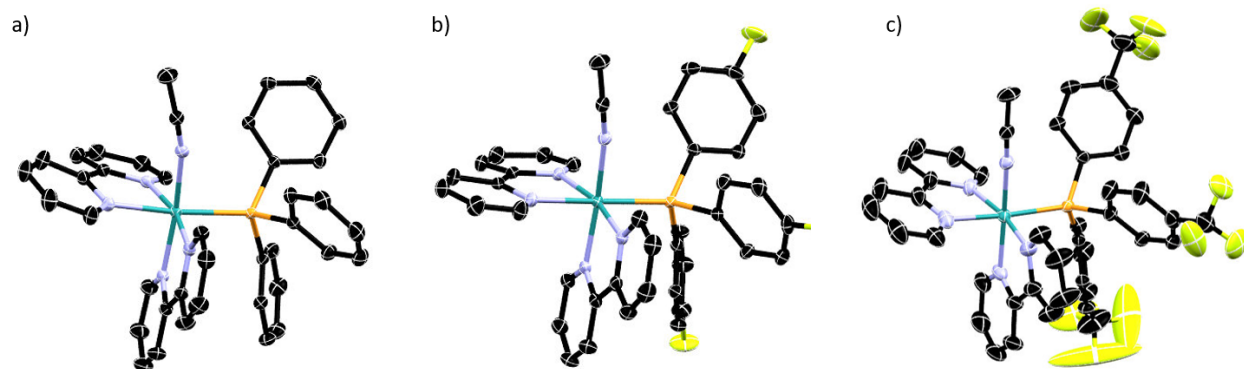

**Figure S3.** Thermal ellipsoid plots of (a) **1**, (b) **2**, and (c) **3**; H atoms,  $\text{PF}_6^-$  ions and co-crystallized solvent molecules omitted for clarity.

**Table S1.** Selected Crystallographic Bond Lengths, Bond Angles, and Phosphine Cone Angles.

| Complex  | Ru-N / Å         |       |                  |       |       | Ru-P / Å | Angles   |            |
|----------|------------------|-------|------------------|-------|-------|----------|----------|------------|
|          | Bpy <sup>a</sup> |       | Bpy <sup>b</sup> |       | ACN   |          | ACN-Ru-P | Cone Angle |
| <b>1</b> | 2.100            | 2.080 | 2.063            | 2.063 | 2.048 | 2.352    | 91.72°   | 142°       |
| <b>2</b> | 2.121            | 2.106 | 2.058            | 2.053 | 2.037 | 2.347    | 91.68°   | 143°       |
| <b>3</b> | 2.114            | 2.100 | 2.050            | 2.062 | 2.040 | 2.338    | 93.46°   | 142°       |
| <b>4</b> | 2.106            | 2.095 | 2.047            | 2.057 | 2.039 | 2.340    | 95.10°   | 142°       |
| <b>5</b> | 2.107            | 2.093 | 2.046            | 2.061 | 2.017 | 2.333    | 91.91°   | 141°       |

<sup>a</sup>Bpy positioned *trans* to the phosphine. <sup>b</sup>Bpy positioned *trans* to the acetonitrile.

**Table S2.** Crystallographic Parameters for **1 – 5**.

| Compound                                                        | <b>1</b>                                                          | <b>2</b>                                           | <b>3</b>                                           | <b>4</b>                                                          | <b>5</b>                                                          |
|-----------------------------------------------------------------|-------------------------------------------------------------------|----------------------------------------------------|----------------------------------------------------|-------------------------------------------------------------------|-------------------------------------------------------------------|
| CCDC Number                                                     | 200988                                                            | 2005084                                            | 2009191                                            | 2009189                                                           | 2009190                                                           |
| Empirical formula                                               | C <sub>43</sub> H <sub>40</sub> O <sub>3</sub> N <sub>5</sub> PRu | C <sub>43</sub> H <sub>40</sub> N <sub>5</sub> PRu | C <sub>40</sub> H <sub>34</sub> N <sub>5</sub> PRu | C <sub>40</sub> H <sub>31</sub> F <sub>3</sub> N <sub>5</sub> PRu | C <sub>43</sub> H <sub>31</sub> F <sub>9</sub> N <sub>5</sub> PRu |
| Formula weight                                                  | 1096.78                                                           | 1048.80                                            | 1080.84                                            | 1060.68                                                           | 1214.71                                                           |
| Temperature (K)                                                 | 150                                                               | 150                                                | 150                                                | 150                                                               | 150                                                               |
| Crystal system                                                  | monoclinic                                                        | monoclinic                                         | monoclinic                                         | monoclinic                                                        | monoclinic                                                        |
| Space group                                                     | P2 <sub>1</sub> /c                                                | P2 <sub>1</sub> /n                                 | P2 <sub>1</sub> /n                                 | P2 <sub>1</sub> /c                                                | P2 <sub>1</sub> /n                                                |
| a/ Å                                                            | 10.3218(6)                                                        | 20.9185(7)                                         | 19.0877(3)                                         | 10.8997(3)                                                        | 11.6837(5)                                                        |
| b/ Å                                                            | 20.5556(14)                                                       | 11.1390(4)                                         | 12.5735(2)                                         | 20.6970(6)                                                        | 24.9343(11)                                                       |
| c/ Å                                                            | 21.4000(14)                                                       | 21.6643(7)                                         | 19.8551(4)                                         | 19.6616(5)                                                        | 17.5584(8)                                                        |
| α/°                                                             | 90                                                                | 90                                                 | 90                                                 | 90                                                                | 90                                                                |
| β/°                                                             | 91.670(2)                                                         | 117.906(10)                                        | 105.015(1)                                         | 100.5230(10)                                                      | 90.019(2)                                                         |
| γ/°                                                             | 90                                                                | 90                                                 | 90                                                 | 90                                                                | 90                                                                |
| Volume/Å <sup>3</sup>                                           | 4538.5(5)                                                         | 4461.0(3)                                          | 4602.51(14)                                        | 4360.9(2)                                                         | 5115.2(4)                                                         |
| Z                                                               | 4                                                                 | 4                                                  | 4                                                  | 4                                                                 | 4                                                                 |
| Density (calc).<br>g/cm <sup>3</sup>                            | 1.605                                                             | 1.5615                                             | 1.5597                                             | 1.616                                                             | 1.577                                                             |
| μ/ mm <sup>-1</sup>                                             | 0.547                                                             | 0.547                                              | 0.535                                              | 0.571                                                             | 0.514                                                             |
| F(000)                                                          | 2218                                                              | 2117                                               | 2189                                               | 2120                                                              | 2416                                                              |
| Crystal size/mm <sup>3</sup>                                    | 0.12 x 0.15 x<br>0.31                                             | 0.08 x 0.15 x<br>0.27                              | 0.09 x 0.20 x<br>0.25                              | 0.11x 0.17 x<br>0.31                                              | 0.13 x 0.18 x<br>0.26                                             |
| Radiation                                                       | MoKα                                                              | MoKα                                               | MoKα                                               | MoKα                                                              | MoKα                                                              |
| Reflections collected                                           | 123501                                                            | 201564                                             | 134812                                             | 115617                                                            | 101022                                                            |
| Theta range for data collection (deg)                           | 2.797 – 27.890                                                    | 2.80 – 27.89                                       | 2.74 – 27.88                                       | 2.736 – 27.884                                                    | 2.838 – 27.907                                                    |
| Independent reflections                                         | 10035                                                             | 8764                                               | 10271                                              | 9388                                                              | 10876                                                             |
| Data/restraints/parameters<br>Goodness-of-fit on F <sup>2</sup> | 1.701                                                             | 1.126                                              | 1.090                                              | 1.049                                                             | 2.384                                                             |
| Final R indexes [all data]                                      | R <sub>1</sub> 0.0397 wR <sub>2</sub> 0.1829                      | R <sub>1</sub> 0.0747 wR <sub>2</sub> 0.1915       | R <sub>1</sub> 0.0237 wR <sub>2</sub> 0.1478       | R <sub>1</sub> 0.0293 wR <sub>2</sub> 0.1194                      | R <sub>1</sub> 0.0790 wR <sub>2</sub> 0.2867                      |
| Largest diff. peak/hole/ e Å <sup>-3</sup>                      | 4.8/-0.6                                                          | 1.7/-1.2                                           | 0.6/-0.6                                           | 0.7/-0.9                                                          | 3.7/-1.4                                                          |

### Emission, Excitation, and Absorption Spectra

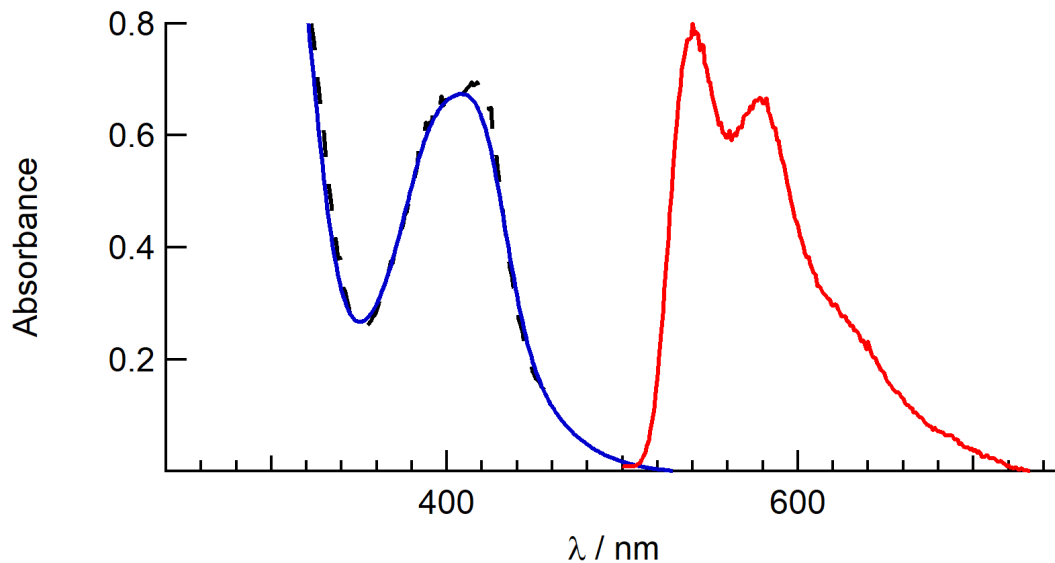

**Figure S4.** Emission (red,  $\lambda_{\text{ex}} = 410$  nm), excitation (black dash,  $\lambda_{\text{em}} = 550$  nm), and absorption spectra (blue) of **1** in CH<sub>3</sub>CN at 77K.

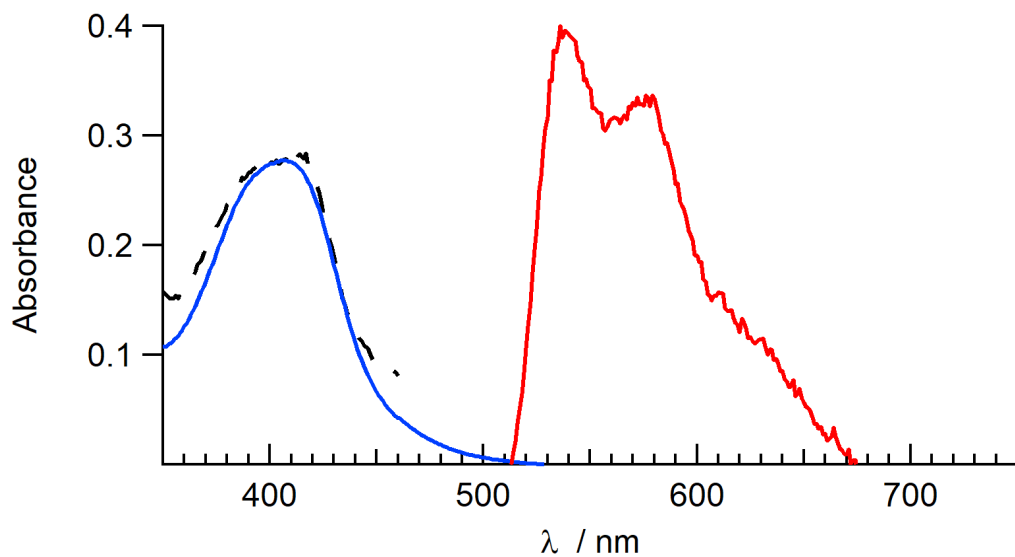

**Figure S5.** Emission (red,  $\lambda_{\text{ex}} = 400$  nm), excitation (black dash,  $\lambda_{\text{em}} = 540$  nm), and absorption spectra (blue) of **2** in CH<sub>3</sub>CN at 77K.

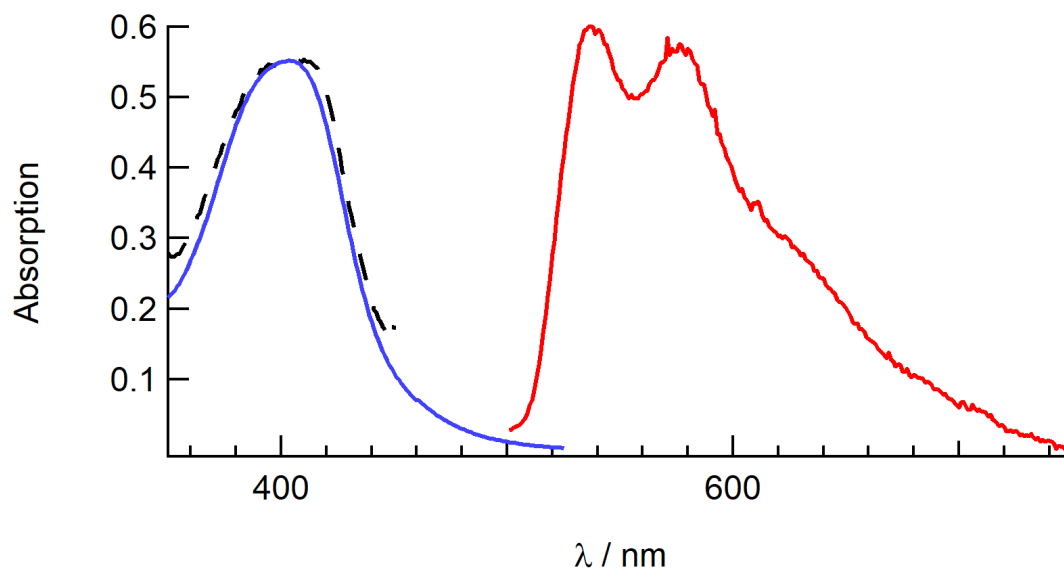

**Figure S6.** Emission (red,  $\lambda_{\text{ex}} = 400 \text{ nm}$ ), excitation (black dash,  $\lambda_{\text{em}} = 540 \text{ nm}$ ), and absorption spectra (blue) of **3** in CH<sub>3</sub>CN at 77K.

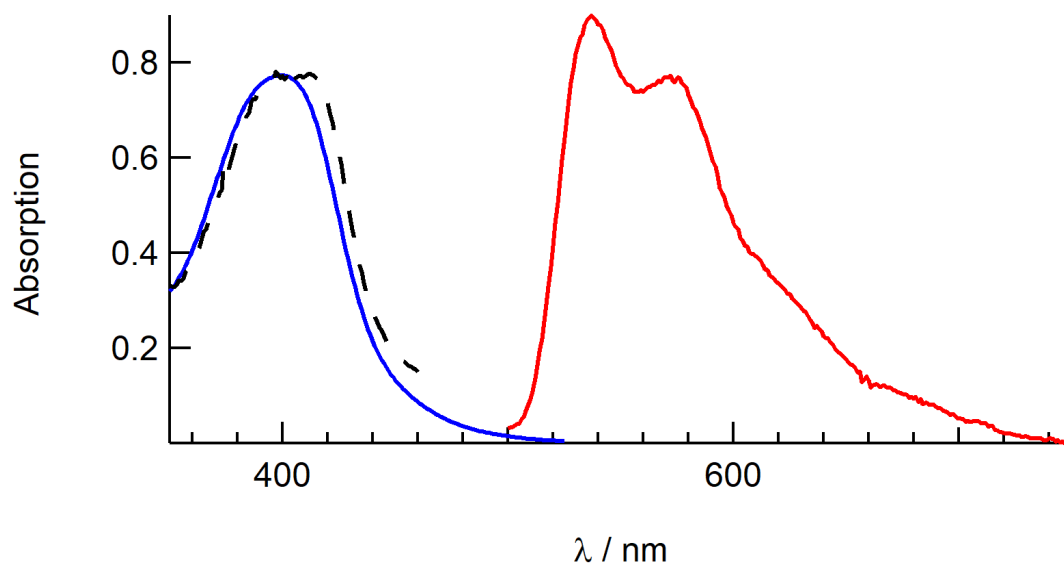

**Figure S7.** Emission (red,  $\lambda_{\text{ex}} = 400 \text{ nm}$ ), excitation (black dash,  $\lambda_{\text{em}} = 540 \text{ nm}$ ), and absorption spectra (blue) of **4** in CH<sub>3</sub>CN at 77 K.

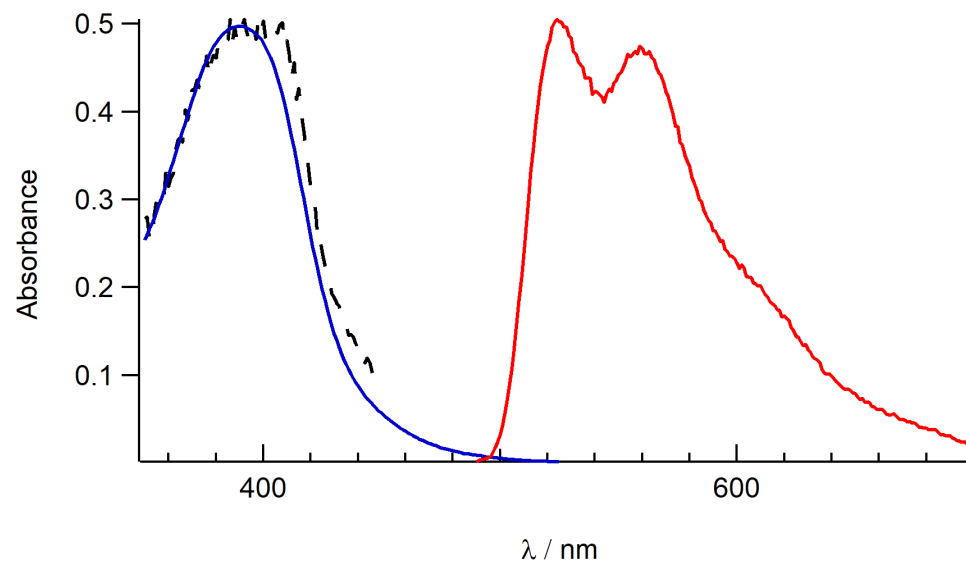

**Figure S8.** Emission (red,  $\lambda_{\text{ex}} = 390$  nm), excitation (black dash,  $\lambda_{\text{em}} = 525$  nm), and absorption spectra (blue) of **5** in  $\text{CH}_3\text{CN}$  at 77 K.

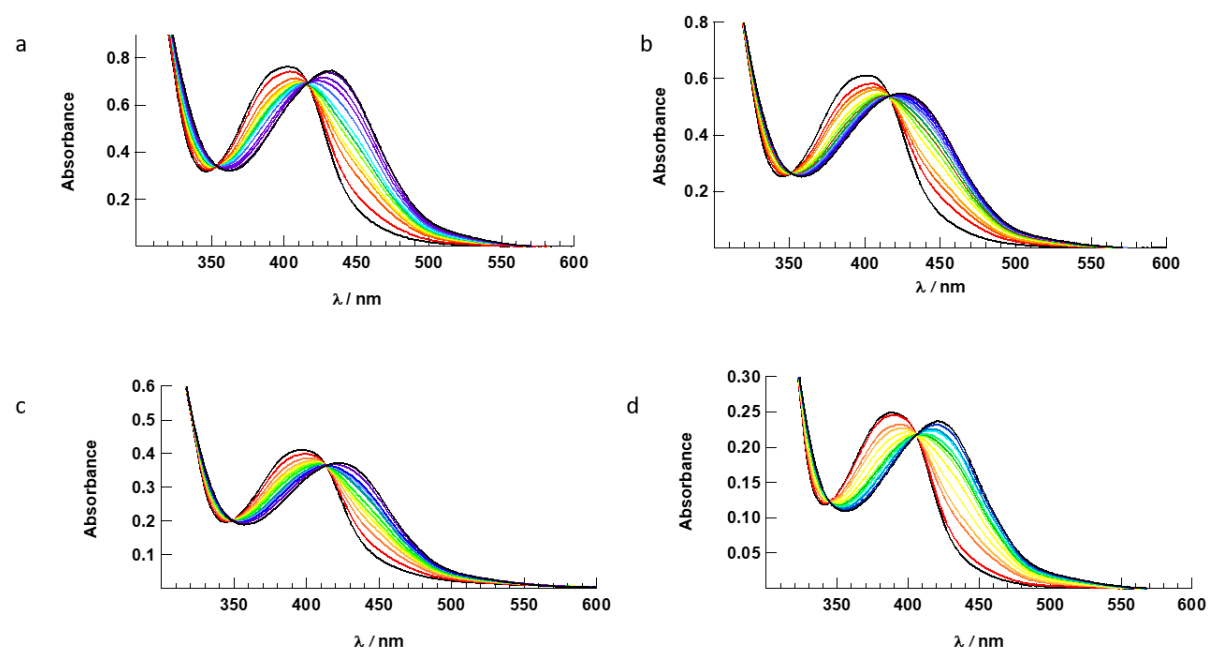

**Figure S9.** Changes to the electronic absorption spectra upon irradiation of (a) **2** (0 – 60 s), (b) **3** (0 – 70 s), (c) **4** (0– 80 s), and (d) **5** (0 – 240 s) in  $\text{H}_2\text{O}$  (<5% acetone) with  $\lambda_{\text{irr}} > 395$  nm.

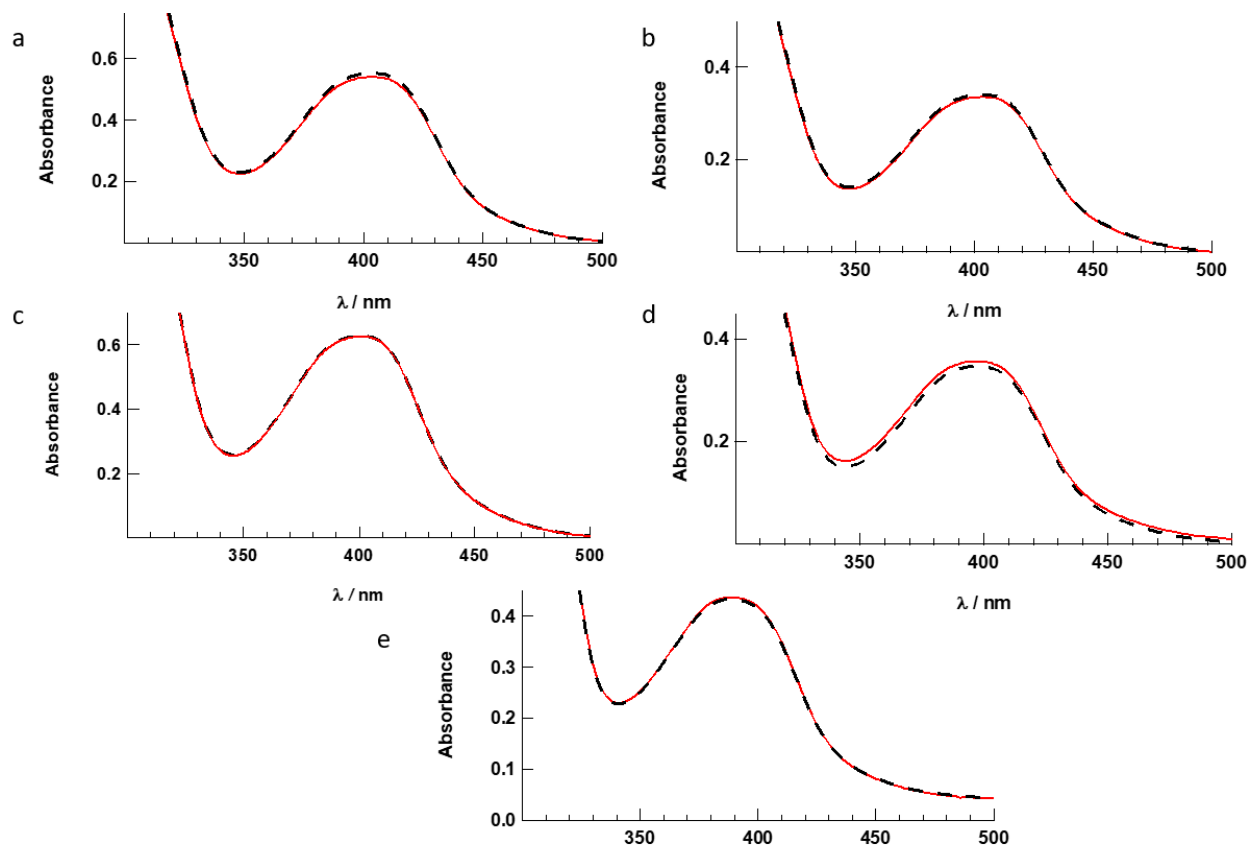

**Figure S10.** Changes to the electronic absorption spectra for (a) **1**, (b) **2**, (c) **3**, (d) **4**, (e) **5** when kept in the dark, showing the initial spectrum (black, dashed) and after 2 h (red, solid) in  $\text{H}_2\text{O}$  (<math><math>5\%</math></math> acetone) at 298 K.



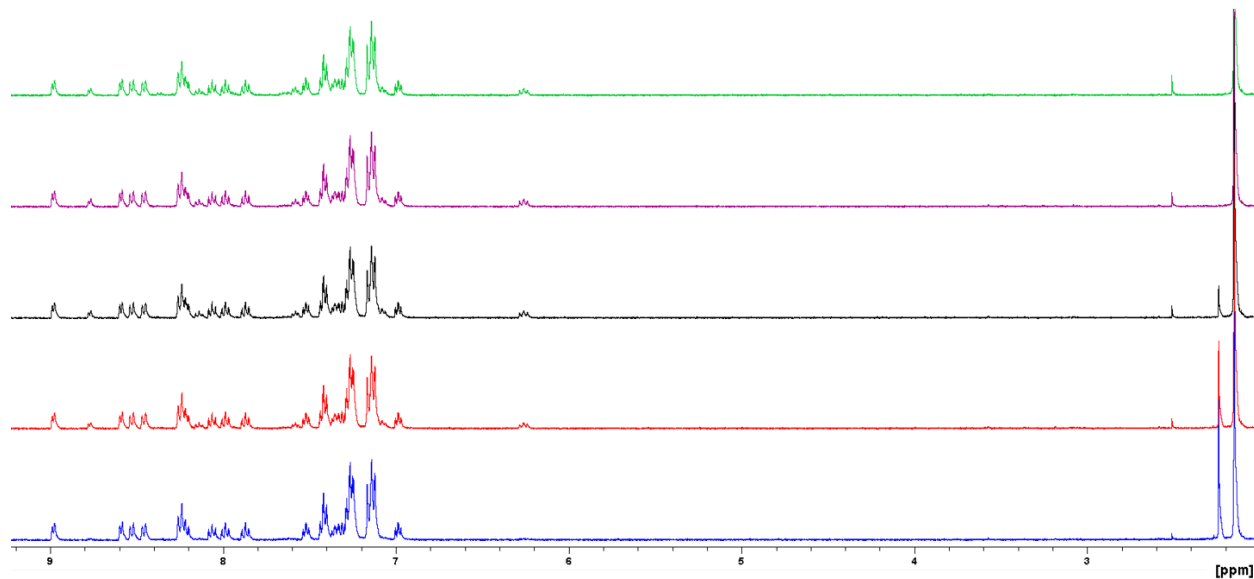

**Figure S11.** Changes to the  $^1\text{H}$  NMR spectrum of **3** in  $\text{CD}_3\text{CN}$  upon irradiation with  $\lambda_{\text{irr}} > 395$  nm for 0 (blue), 15s (red), 30s (black), 45s (purple) and 1 min (green).

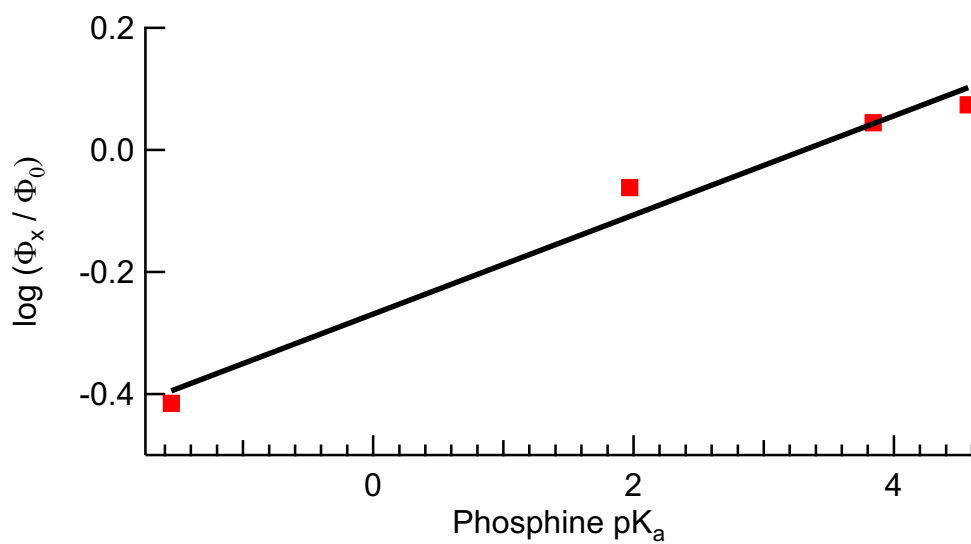

**Figure S12.** Plot of the quantum yield values,  $\Phi_x$ , relative to that of **3**,  $\Phi_0$ , as a function of phosphine pK<sub>a</sub>.

## DTF Optimized Structures

**Table S3.** Experimental and calculated bond lengths (Å) for **1**.

|                   | Ru-N/ Å          |       |                  |       | Ru-N/ Å | N-RuP/ ° |       |
|-------------------|------------------|-------|------------------|-------|---------|----------|-------|
|                   | bpy <sup>a</sup> |       | bpy <sup>b</sup> |       |         |          | ACN   |
| Exper.            | 2.078            | 2.102 | 2.065            | 2.060 | 2.045   | 2.352    | 91.69 |
| <sup>1</sup> GS   | 2.101            | 2.133 | 2.072            | 2.072 | 2.072   | 2.424    | 89.28 |
| <sup>3</sup> MLCT | 2.099            | 2.103 | 2.083            | 2.046 | 2.040   | 2.458    | 85.81 |

<sup>a</sup>Bpy positioned *trans* to the phosphine. <sup>b</sup>Bpy positioned *trans* to the acetonitrile.

**Table S4.** Experimental and calculated bond lengths (Å) for **2**.

|                   | Ru-N/ Å          |       |                  |       | Ru-N/ Å | N-RuP/ ° |       |
|-------------------|------------------|-------|------------------|-------|---------|----------|-------|
|                   | bpy <sup>a</sup> |       | bpy <sup>b</sup> |       |         |          | ACN   |
| Exper.            | 2.121            | 2.106 | 2.053            | 2.058 | 2.037   | 2.347    | 91.68 |
| <sup>1</sup> GS   | 2.128            | 2.108 | 2.071            | 2.073 | 2.009   | 2.433    | 88.48 |
| <sup>3</sup> MLCT | 2.121            | 2.097 | 2.063            | 2.043 | 2.053   | 2.494    | 91.51 |

<sup>a</sup>Bpy positioned *trans* to the phosphine. <sup>b</sup>Bpy positioned *trans* to the acetonitrile.

**Table S5.** Experimental and calculated bond lengths (Å) for **3**.

|                   | Ru-N/ Å          |       |                  |       | Ru-N/ Å | N-RuP/ ° |       |
|-------------------|------------------|-------|------------------|-------|---------|----------|-------|
|                   | bpy <sup>a</sup> |       | Bpy <sup>b</sup> |       |         |          | ACN   |
| Exper.            | 2.100            | 2.115 | 2.062            | 2.050 | 2.039   | 2.337    | 93.48 |
| <sup>1</sup> GS   | 2.103            | 2.127 | 2.073            | 2.074 | 2.011   | 2.418    | 89.54 |
| <sup>3</sup> MLCT | 2.105            | 2.116 | 2.031            | 2.076 | 2.054   | 2.470    | 86.84 |

<sup>a</sup>Bpy positioned *trans* to the phosphine. <sup>b</sup>Bpy positioned *trans* to the acetonitrile.

**Table S6.** Experimental and calculated bond lengths (Å) for **4**.

|                   | Ru-N/ Å          |       |                  |       | Ru-N/ Å | N-RuP/ ° |       |
|-------------------|------------------|-------|------------------|-------|---------|----------|-------|
|                   | bpy <sup>a</sup> |       | Bpy <sup>b</sup> |       |         |          | ACN   |
| Exper.            | 2.106            | 2.095 | 2.047            | 2.057 | 2.039   | 2.340    | 95.10 |
| <sup>1</sup> GS   | 2.104            | 2.128 | 2.073            | 2.075 | 2.012   | 2.418    | 89.88 |
| <sup>3</sup> MLCT | 2.104            | 2.112 | 2.033            | 2.078 | 2.056   | 2.470    | 86.94 |

<sup>a</sup>Bpy positioned *trans* to the phosphine. <sup>b</sup>Bpy positioned *trans* to the acetonitrile.

**Table S7.** Experimental and calculated bond lengths (Å) for **5**.

|                   | Ru-N/ Å          |       |                  |       | Ru-N/ Å | N-RuP/ ° |       |
|-------------------|------------------|-------|------------------|-------|---------|----------|-------|
|                   | bpy <sup>a</sup> |       | Bpy <sup>b</sup> |       |         |          | ACN   |
| Exper.            | 2.046            | 2.062 | 2.092            | 2.108 | 2.017   | 2.333    | 91.93 |
| <sup>1</sup> GS   | 2.074            | 2.078 | 2.104            | 2.124 | 2.015   | 2.413    | 89.86 |
| <sup>3</sup> MLCT | 2.029            | 2.072 | 2.118            | 2.139 | 2.053   | 2.476    | 90.87 |

<sup>a</sup>Bpy positioned *trans* to the phosphine. <sup>b</sup>Bpy positioned *trans* to the acetonitrile.

## Atomic Coordinates

**Table S8.** Optimized atomic coordinates (x,y,z) for <sup>1</sup>GS and <sup>3</sup>MLCT excited state of **1** using PBE.

| <sup>1</sup> GS |          |          |          | <sup>3</sup> MLCT |          |          |          |
|-----------------|----------|----------|----------|-------------------|----------|----------|----------|
| 44              | 4.086978 | 13.53362 | 16.39322 | 44                | 4.180369 | 13.53314 | 16.33232 |
| 15              | 5.670746 | 15.2891  | 15.86045 | 15                | 5.668168 | 15.42971 | 15.85269 |
| 8               | 6.828938 | 19.01432 | 20.45182 | 8                 | 6.717438 | 19.11624 | 20.47621 |
| 8               | 4.140443 | 19.46632 | 11.79631 | 8                 | 4.17647  | 19.50707 | 11.69827 |
| 7               | 3.8459   | 12.76589 | 14.45274 | 7                 | 3.841849 | 12.77385 | 14.40496 |
| 8               | 10.97935 | 13.36632 | 13.74038 | 8                 | 10.94701 | 13.34489 | 13.88095 |
| 7               | 2.587116 | 14.84175 | 16.12988 | 7                 | 2.653572 | 14.8664  | 16.10526 |
| 7               | 2.567254 | 12.06161 | 16.66371 | 7                 | 2.634167 | 12.15747 | 16.70615 |
| 7               | 4.294991 | 13.8967  | 18.42266 | 7                 | 4.444932 | 13.87027 | 18.37088 |
| 7               | 5.5211   | 12.13274 | 16.9165  | 7                 | 5.547619 | 12.07865 | 16.77971 |
| 6               | 7.733111 | 15.12348 | 13.90602 | 6                 | 7.731125 | 15.14538 | 13.92264 |
| 1               | 7.128007 | 15.81098 | 13.31295 | 1                 | 7.142863 | 15.82264 | 13.30206 |
| 6               | 5.098768 | 16.54157 | 14.62247 | 6                 | 5.111016 | 16.65032 | 14.5901  |
| 6               | 6.11161  | 16.38051 | 17.2898  | 6                 | 6.076902 | 16.51838 | 17.283   |
| 6               | 5.160402 | 13.06693 | 19.09018 | 6                 | 5.232538 | 12.91857 | 19.00201 |
| 6               | 3.711794 | 17.24847 | 12.73715 | 6                 | 3.736979 | 17.31227 | 12.68242 |
| 1               | 2.910718 | 17.02141 | 12.03387 | 1                 | 2.940973 | 17.0705  | 11.97855 |
| 6               | 7.288734 | 14.71052 | 15.17286 | 6                 | 7.272925 | 14.78764 | 15.20517 |
| 6               | 5.405392 | 18.15211 | 18.8082  | 6                 | 5.352941 | 18.31466 | 18.75972 |
| 1               | 4.663168 | 18.87448 | 19.15187 | 1                 | 4.620409 | 19.06207 | 19.06802 |
| 6               | 2.825737 | 11.8604  | 14.29148 | 6                 | 2.867666 | 11.78895 | 14.34538 |
| 6               | 5.831457 | 12.07068 | 18.25117 | 6                 | 5.844007 | 11.94775 | 18.13334 |
| 6               | 2.092829 | 11.50025 | 15.51396 | 6                 | 2.178127 | 11.49567 | 15.58185 |
| 6               | 4.071291 | 16.30018 | 13.70096 | 6                 | 4.087632 | 16.38574 | 13.66737 |
| 1               | 3.525255 | 15.35808 | 13.72385 | 1                 | 3.545671 | 15.44179 | 13.70607 |
| 6               | 8.119395 | 13.83667 | 15.90884 | 6                 | 8.062998 | 13.90701 | 15.97939 |
| 1               | 7.822447 | 13.49713 | 16.9019  | 1                 | 7.725113 | 13.58109 | 16.96374 |
| 6               | 1.986421 | 11.73668 | 17.83707 | 6                 | 2.022146 | 11.95193 | 17.89411 |
| 1               | 2.398798 | 12.21188 | 18.72635 | 1                 | 2.419457 | 12.5089  | 18.74127 |
| 6               | 4.425612 | 12.46676 | 12.12631 | 6                 | 4.315165 | 12.43536 | 12.0623  |
| 1               | 5.09657  | 12.72776 | 11.30768 | 1                 | 4.915654 | 12.712   | 11.19629 |
| 6               | 8.955892 | 14.6949  | 13.38368 | 6                 | 8.954775 | 14.68858 | 13.43882 |
| 1               | 9.266899 | 15.0483  | 12.40104 | 1                 | 9.293177 | 15.00948 | 12.45411 |
| 6               | 4.63185  | 13.03151 | 13.38044 | 6                 | 4.537029 | 13.06308 | 13.27817 |
| 1               | 5.460842 | 13.71721 | 13.55107 | 1                 | 5.317812 | 13.81567 | 13.37971 |
| 6               | 5.136912 | 17.288   | 17.75757 | 6                 | 5.109982 | 17.46228 | 17.69637 |

|   |          |          |          |   |          |          |          |
|---|----------|----------|----------|---|----------|----------|----------|
| 1 | 4.167557 | 17.3526  | 17.25767 | 1 | 4.169472 | 17.55653 | 17.14913 |
| 6 | 9.341621 | 13.41321 | 15.40824 | 6 | 9.285424 | 13.4542  | 15.5151  |
| 1 | 9.99193  | 12.75573 | 15.98737 | 1 | 9.910413 | 12.79352 | 16.1174  |
| 6 | 6.66643  | 18.13232 | 19.43949 | 6 | 6.577907 | 18.24314 | 19.46043 |
| 6 | 5.771673 | 17.78297 | 14.55291 | 6 | 5.786765 | 17.89005 | 14.50113 |
| 1 | 6.576249 | 18.00705 | 15.25509 | 1 | 6.58738  | 18.12871 | 15.20327 |
| 6 | 0.915411 | 10.85307 | 17.92795 | 6 | 0.957604 | 11.07867 | 18.04807 |
| 1 | 0.486241 | 10.62243 | 18.90313 | 1 | 0.513817 | 10.93645 | 19.03276 |
| 6 | 2.566774 | 11.27284 | 13.04642 | 6 | 2.609742 | 11.12253 | 13.12863 |
| 1 | 1.751268 | 10.55879 | 12.9402  | 1 | 1.85432  | 10.33848 | 13.09409 |
| 6 | 4.393867 | 18.4769  | 12.68007 | 6 | 4.421065 | 18.53998 | 12.60376 |
| 6 | 1.67676  | 15.55777 | 15.99396 | 6 | 1.700327 | 15.52922 | 16.01645 |
| 6 | 7.364084 | 16.37609 | 17.916   | 6 | 7.293482 | 16.46049 | 17.98007 |
| 1 | 8.159053 | 15.72263 | 17.55547 | 1 | 8.077476 | 15.77069 | 17.66696 |
| 6 | 9.776285 | 13.83625 | 14.13539 | 6 | 9.748931 | 13.84008 | 14.23642 |
| 6 | 5.427984 | 18.73258 | 13.60435 | 6 | 5.451544 | 18.81685 | 13.52865 |
| 1 | 5.948604 | 19.68997 | 13.55276 | 1 | 5.974625 | 19.77147 | 13.45585 |
| 6 | 1.006704 | 10.61472 | 15.54161 | 6 | 1.09027  | 10.60315 | 15.69243 |
| 1 | 0.625449 | 10.18115 | 14.61804 | 1 | 0.721437 | 10.08767 | 14.80652 |
| 6 | 3.361223 | 11.58238 | 11.94664 | 6 | 3.321673 | 11.44168 | 11.98566 |
| 1 | 3.163702 | 11.12775 | 10.97518 | 1 | 3.123609 | 10.92059 | 11.04843 |
| 6 | 11.49977 | 13.79099 | 12.46877 | 6 | 11.49896 | 13.68979 | 12.59428 |
| 1 | 10.84633 | 13.46676 | 11.64352 | 1 | 10.85085 | 13.33127 | 11.78037 |
| 1 | 12.47494 | 13.3029  | 12.37571 | 1 | 12.46531 | 13.17889 | 12.54881 |
| 1 | 11.63112 | 14.8838  | 12.43972 | 1 | 11.65021 | 14.77675 | 12.51252 |
| 6 | 6.721953 | 11.10672 | 18.74035 | 6 | 6.707993 | 10.91738 | 18.56362 |
| 1 | 6.958306 | 11.07228 | 19.80312 | 1 | 6.943644 | 10.82115 | 19.62296 |
| 6 | 3.613789 | 14.82072 | 19.13843 | 6 | 3.850862 | 14.82581 | 19.12057 |
| 1 | 2.937158 | 15.45494 | 18.57079 | 1 | 3.242165 | 15.54505 | 18.57616 |
| 6 | 0.410869 | 10.28627 | 16.75613 | 6 | 0.48178  | 10.3887  | 16.91663 |
| 1 | -0.43422 | 9.59737  | 16.7868  | 1 | -0.35918 | 9.699216 | 16.99946 |
| 6 | 3.753196 | 14.96575 | 20.51386 | 6 | 3.976046 | 14.89491 | 20.49944 |
| 1 | 3.176226 | 15.73107 | 21.03306 | 1 | 3.462476 | 15.68299 | 21.04899 |
| 6 | 7.647487 | 17.23705 | 18.98134 | 6 | 7.551073 | 17.30874 | 19.05698 |
| 1 | 8.64055  | 17.2181  | 19.42929 | 1 | 8.514523 | 17.25159 | 19.56241 |
| 6 | 5.347271 | 13.17768 | 20.47335 | 6 | 5.387653 | 12.94974 | 20.40521 |
| 1 | 6.042957 | 12.51357 | 20.98473 | 1 | 5.994549 | 12.19068 | 20.89767 |
| 6 | 4.64055  | 14.13312 | 21.1977  | 6 | 4.76282  | 13.92909 | 21.15637 |
| 1 | 4.778856 | 14.22454 | 22.27551 | 1 | 4.874927 | 13.94686 | 22.241   |
| 6 | 6.093502 | 11.23701 | 16.08041 | 6 | 6.087114 | 11.19751 | 15.89984 |
| 1 | 5.832881 | 11.32792 | 15.02834 | 1 | 5.823738 | 11.34453 | 14.8544  |

|   |          |          |          |   |          |          |          |
|---|----------|----------|----------|---|----------|----------|----------|
| 6 | 3.112187 | 19.26832 | 10.81413 | 6 | 3.152714 | 19.29471 | 10.71072 |
| 1 | 3.099624 | 20.18474 | 10.21579 | 1 | 3.150104 | 20.2     | 10.09594 |
| 1 | 2.128206 | 19.12866 | 11.28986 | 1 | 2.166227 | 19.16911 | 11.18389 |
| 1 | 3.342501 | 18.40903 | 10.16448 | 1 | 3.38565  | 18.42214 | 10.0808  |
| 6 | 6.976122 | 10.25504 | 16.51484 | 6 | 6.93128  | 10.17222 | 16.28508 |
| 1 | 7.40367  | 9.561269 | 15.79094 | 1 | 7.330985 | 9.493398 | 15.53275 |
| 6 | 0.577017 | 16.47807 | 15.79604 | 6 | 0.52593  | 16.36351 | 15.8888  |
| 1 | 0.907926 | 17.32708 | 15.17856 | 1 | 0.753268 | 17.2364  | 15.25828 |
| 1 | 0.211556 | 16.86404 | 16.75921 | 1 | 0.192987 | 16.71775 | 16.87562 |
| 1 | -0.25756 | 15.97521 | 15.28559 | 1 | -0.29466 | 15.79671 | 15.42472 |
| 6 | 8.11241  | 19.09253 | 21.09371 | 6 | 7.950505 | 19.13292 | 21.22053 |
| 1 | 8.897807 | 19.37749 | 20.37638 | 1 | 8.799744 | 19.38473 | 20.5672  |
| 1 | 8.374329 | 18.139   | 21.57937 | 1 | 8.125115 | 18.1655  | 21.71599 |
| 1 | 8.011348 | 19.87365 | 21.85377 | 1 | 7.822625 | 19.91526 | 21.97471 |
| 6 | 7.301207 | 10.18724 | 17.87063 | 6 | 7.250105 | 10.03016 | 17.65229 |
| 1 | 7.991559 | 9.430713 | 18.24545 | 1 | 7.910951 | 9.230379 | 17.9885  |

**Table S9.** Optimized atomic coordinates (x,y,z) for  $^1\text{GS}$  and  $^3\text{MLCT}$  excited state of **2** using PBE.

| $^1\text{GS}$ |          |          |          | $^3\text{MLCT}$ |          |          |          |
|---------------|----------|----------|----------|-----------------|----------|----------|----------|
| 44            | -0.76336 | 5.481167 | 10.19445 | 44              | -0.71212 | 5.390014 | 10.21023 |
| 15            | 1.58689  | 5.238679 | 9.614048 | 15              | 1.717144 | 5.144994 | 9.703096 |
| 7             | -2.80684 | 5.498224 | 10.78777 | 7               | -2.75882 | 5.570959 | 10.73794 |
| 7             | -0.30745 | 7.212205 | 11.23635 | 7               | -0.23309 | 6.940171 | 11.48481 |
| 7             | -1.18966 | 6.938813 | 8.783039 | 7               | -1.03504 | 6.988027 | 8.979199 |
| 7             | -1.58594 | 3.908635 | 9.056192 | 7               | -1.60392 | 3.972886 | 8.947791 |
| 7             | -0.44972 | 4.254069 | 11.75432 | 7               | -0.61021 | 3.942592 | 11.66326 |
| 6             | -0.47828 | 8.387569 | 10.54787 | 6               | -0.53675 | 8.202192 | 10.97767 |
| 6             | -3.56798 | 4.475524 | 10.30178 | 6               | -3.61472 | 4.861812 | 9.920754 |
| 6             | 2.70965  | 5.671713 | 11.02746 | 6               | 2.871897 | 5.795172 | 10.98539 |
| 6             | 3.343542 | 4.666955 | 11.77692 | 6               | 3.719731 | 4.916004 | 11.68056 |
| 6             | 2.939132 | 7.012185 | 11.38571 | 6               | 2.935363 | 7.168912 | 11.28545 |
| 6             | 2.207812 | 6.247815 | 8.190349 | 6               | 2.12065  | 6.032183 | 8.12934  |
| 6             | -0.96421 | 8.232408 | 9.174315 | 6               | -0.93642 | 8.229295 | 9.600302 |
| 6             | 1.496346 | 6.201407 | 6.979395 | 6               | 1.493854 | 5.595258 | 6.944875 |
| 6             | 2.160632 | 3.526534 | 9.16726  | 6               | 2.356014 | 3.440752 | 9.359375 |
| 6             | -2.90326 | 3.615215 | 9.313567 | 6               | -2.99031 | 4.023092 | 8.920844 |
| 6             | 3.887142 | 7.611805 | 7.080163 | 6               | 3.355939 | 7.655776 | 6.814149 |
| 6             | 3.421536 | 6.954673 | 8.220575 | 6               | 3.054976 | 7.076999 | 8.047073 |
| 1             | 4.025205 | 6.97743  | 9.127688 | 1               | 3.58429  | 7.419724 | 8.935432 |

|   |          |          |          |   |          |          |          |
|---|----------|----------|----------|---|----------|----------|----------|
| 6 | 3.16559  | 0.929624 | 8.588128 | 6 | 3.502159 | 0.876999 | 8.926826 |
| 6 | 3.791589 | 7.331398 | 12.44349 | 6 | 3.84124  | 7.644207 | 12.23219 |
| 6 | -3.36079 | 6.367813 | 11.65836 | 6 | -3.26311 | 6.304697 | 11.75434 |
| 1 | -2.71427 | 7.16675  | 12.01867 | 1 | -2.53842 | 6.829152 | 12.37559 |
| 6 | -1.74457 | 6.724668 | 7.568075 | 6 | -1.44355 | 6.924481 | 7.689543 |
| 6 | 1.623813 | 2.38867  | 9.794056 | 6 | 1.852144 | 2.307774 | 10.01864 |
| 6 | 3.174107 | 7.581656 | 5.871243 | 6 | 2.740495 | 7.22243  | 5.625211 |
| 6 | -0.96594 | 3.211394 | 8.074333 | 6 | -0.97351 | 3.072115 | 8.153932 |
| 6 | -1.58742 | 2.204405 | 7.342346 | 6 | -1.64264 | 2.255399 | 7.256    |
| 6 | 2.120187 | 1.115894 | 9.507659 | 6 | 2.416307 | 1.049507 | 9.800882 |
| 6 | 3.201231 | 3.347835 | 8.239369 | 6 | 3.442329 | 3.277492 | 8.477927 |
| 6 | 1.972534 | 6.853891 | 5.843043 | 6 | 1.805548 | 6.176217 | 5.71875  |
| 1 | 1.407406 | 6.7892   | 4.909911 | 1 | 1.318819 | 5.809454 | 4.811957 |
| 6 | -3.57238 | 2.601129 | 8.616777 | 6 | -3.70748 | 3.230322 | 8.002855 |
| 6 | 4.180976 | 4.996193 | 12.84456 | 6 | 4.609313 | 5.402657 | 12.63888 |
| 6 | -0.3368  | 3.580788 | 12.70027 | 6 | -0.74507 | 3.193176 | 12.54419 |
| 6 | 4.431648 | 6.33237  | 13.19529 | 6 | 4.699411 | 6.774314 | 12.92676 |
| 6 | -0.26291 | 9.624619 | 11.16791 | 6 | -0.43496 | 9.33607  | 11.81538 |
| 1 | -0.39618 | 10.54734 | 10.60454 | 1 | -0.69    | 10.31993 | 11.42261 |
| 6 | 3.687897 | 2.071071 | 7.957499 | 6 | 3.998721 | 2.017449 | 8.27028  |
| 6 | 0.061118 | 7.276241 | 12.53733 | 6 | 0.197929 | 6.830666 | 12.76528 |
| 6 | -4.89837 | 4.312036 | 10.71225 | 6 | -5.00788 | 4.941383 | 10.13186 |
| 1 | -5.49497 | 3.485089 | 10.32961 | 1 | -5.68629 | 4.380928 | 9.489978 |
| 6 | -2.064   | 7.752889 | 6.689911 | 6 | -1.74273 | 8.050268 | 6.942867 |
| 1 | -2.51153 | 7.514491 | 5.724878 | 1 | -2.06032 | 7.939789 | 5.90685  |
| 6 | -2.9136  | 1.879269 | 7.625885 | 6 | -3.04237 | 2.354809 | 7.160685 |
| 6 | -4.67904 | 6.264071 | 12.0903  | 6 | -4.62329 | 6.403728 | 12.00382 |
| 6 | -0.16294 | 2.742858 | 13.86809 | 6 | -0.89456 | 2.253247 | 13.63235 |
| 1 | -0.40574 | 1.696416 | 13.63053 | 1 | -1.49395 | 1.38928  | 13.30921 |
| 1 | -0.82053 | 3.07525  | 14.68501 | 1 | -1.40279 | 2.734644 | 14.48142 |
| 1 | 0.880473 | 2.790678 | 14.21447 | 1 | 0.09115  | 1.898207 | 13.9686  |
| 6 | 0.258658 | 8.478374 | 13.20732 | 6 | 0.297725 | 7.9151   | 13.61888 |
| 6 | -5.46175 | 5.210968 | 11.6131  | 6 | -5.51489 | 5.712328 | 11.16348 |
| 1 | -6.49654 | 5.091588 | 11.9366  | 1 | -6.59153 | 5.77143  | 11.32757 |
| 6 | -1.7964  | 9.071099 | 7.064403 | 6 | -1.6259  | 9.32005  | 7.548097 |
| 6 | 0.10449  | 9.677802 | 12.50998 | 6 | -0.03216 | 9.198797 | 13.13056 |
| 1 | 0.26327  | 10.63818 | 13.00173 | 1 | 0.03098  | 10.07214 | 13.78066 |
| 6 | 3.676167 | 8.307148 | 4.653808 | 6 | 3.101498 | 7.829983 | 4.301365 |
| 1 | 3.353575 | 9.360984 | 4.667759 | 1 | 3.32266  | 8.902195 | 4.394494 |
| 1 | 3.292329 | 7.859239 | 3.727495 | 1 | 2.302674 | 7.698017 | 3.559713 |
| 1 | 4.773799 | 8.307431 | 4.609459 | 1 | 4.007411 | 7.350902 | 3.893716 |

|   |          |          |          |   |          |          |          |
|---|----------|----------|----------|---|----------|----------|----------|
| 6 | -1.24703 | 9.305998 | 8.320328 | 6 | -1.22616 | 9.402621 | 8.867212 |
| 1 | -1.04713 | 10.32694 | 8.643006 | 1 | -1.13285 | 10.37466 | 9.350123 |
| 6 | 3.721849 | -0.43744 | 8.302538 | 6 | 4.127381 | -0.47181 | 8.712009 |
| 1 | 4.633064 | -0.61467 | 8.896577 | 1 | 5.062964 | -0.55884 | 9.288107 |
| 1 | 4.002184 | -0.54682 | 7.245812 | 1 | 4.387431 | -0.63156 | 7.656204 |
| 1 | 3.005814 | -1.23022 | 8.556567 | 1 | 3.464527 | -1.28516 | 9.034511 |
| 6 | 5.384829 | 6.681241 | 14.30487 | 6 | 5.700981 | 7.296568 | 13.91773 |
| 1 | 6.413683 | 6.760974 | 13.91801 | 1 | 6.65715  | 7.518656 | 13.41625 |
| 1 | 5.393985 | 5.912079 | 15.08905 | 1 | 5.913037 | 6.561657 | 14.7059  |
| 1 | 5.137043 | 7.646661 | 14.76653 | 1 | 5.359479 | 8.227679 | 14.38972 |
| 1 | 0.572474 | 5.625387 | 6.908134 | 1 | 0.779662 | 4.770189 | 6.969744 |
| 1 | -4.61618 | 2.384434 | 8.839526 | 1 | -4.79354 | 3.303194 | 7.9604   |
| 1 | 3.209752 | 3.617338 | 11.51114 | 1 | 3.701659 | 3.846977 | 11.46541 |
| 1 | 0.801576 | 2.490978 | 10.50196 | 1 | 1.00679  | 2.401072 | 10.69777 |
| 1 | 1.685036 | 0.245809 | 10.00572 | 1 | 2.004763 | 0.180267 | 10.31941 |
| 1 | 0.075993 | 3.463387 | 7.892837 | 1 | 0.109376 | 3.01994  | 8.256381 |
| 1 | 0.545763 | 8.463499 | 14.25877 | 1 | 0.633665 | 7.764798 | 14.64412 |
| 1 | -1.92715 | 5.685163 | 7.301744 | 1 | -1.51964 | 5.926947 | 7.260981 |
| 1 | -3.43015 | 1.089007 | 7.079855 | 1 | -3.59864 | 1.74352  | 6.449244 |
| 1 | 3.637678 | 4.207826 | 7.730189 | 1 | 3.859581 | 4.137708 | 7.953236 |
| 1 | 4.671976 | 4.194977 | 13.40262 | 1 | 5.26082  | 4.700353 | 13.16419 |
| 1 | 2.47706  | 7.823184 | 10.81909 | 1 | 2.283589 | 7.881255 | 10.77694 |
| 1 | 4.495735 | 1.959907 | 7.230228 | 1 | 4.841203 | 1.916099 | 7.582023 |
| 1 | 4.837987 | 8.147962 | 7.128688 | 1 | 4.101313 | 8.453491 | 6.770947 |
| 1 | -1.02349 | 1.684059 | 6.567966 | 1 | -1.07552 | 1.558891 | 6.639056 |
| 1 | 3.971132 | 8.382026 | 12.68545 | 1 | 3.883676 | 8.716601 | 12.43711 |
| 1 | 0.201545 | 6.321052 | 13.03837 | 1 | 0.457948 | 5.826042 | 13.09478 |
| 1 | -2.02245 | 9.90185  | 6.395081 | 1 | -1.85183 | 10.22537 | 6.983554 |
| 1 | -5.07692 | 6.997574 | 12.79173 | 1 | -4.9774  | 7.016268 | 12.83224 |

**Table S10.** Optimized atomic coordinates (x,y,z) for  $^1\text{GS}$  and  $^3\text{MLCT}$  excited state of **3** using PBE.

| $^1\text{GS}$ |          |          |          | $^3\text{MLCT}$ |          |          |          |
|---------------|----------|----------|----------|-----------------|----------|----------|----------|
| 44            | 0.393733 | 3.47772  | 4.304272 | 44              | 0.381974 | 3.455552 | 4.226848 |
| 7             | 1.582639 | 2.088908 | 3.265192 | 7               | 1.589259 | 2.044095 | 3.237186 |
| 7             | 0.523993 | 1.863054 | 5.683316 | 7               | 0.499335 | 1.918347 | 5.675896 |
| 7             | -1.38616 | 2.692725 | 3.589308 | 7               | -1.35421 | 2.646153 | 3.551312 |
| 7             | -0.99875 | 4.51533  | 5.439051 | 7               | -0.9876  | 4.515823 | 5.372086 |
| 6             | 2.213929 | 5.91049  | 2.283005 | 6               | 2.238148 | 6.006214 | 2.298138 |
| 6             | 2.337884 | 7.171569 | 1.669157 | 6               | 2.371952 | 7.288621 | 1.731647 |

|   |          |          |          |   |          |          |          |
|---|----------|----------|----------|---|----------|----------|----------|
| 1 | 1.452558 | 7.782947 | 1.487056 | 1 | 1.496284 | 7.924633 | 1.594441 |
| 6 | 3.591642 | 7.652343 | 1.288125 | 6 | 3.626642 | 7.756218 | 1.336962 |
| 1 | 3.671261 | 8.631439 | 0.812662 | 1 | 3.716021 | 8.75131  | 0.897994 |
| 6 | 4.738908 | 6.884608 | 1.512547 | 6 | 4.76095  | 6.954572 | 1.499023 |
| 1 | 5.717803 | 7.262577 | 1.212837 | 1 | 5.739935 | 7.322787 | 1.187758 |
| 6 | 4.625412 | 5.631921 | 2.119509 | 6 | 4.635111 | 5.67903  | 2.054737 |
| 1 | 5.516796 | 5.025495 | 2.292316 | 1 | 5.515791 | 5.044861 | 2.173491 |
| 6 | 3.37018  | 5.147113 | 2.503471 | 6 | 3.380728 | 5.205268 | 2.452593 |
| 1 | 3.300493 | 4.170598 | 2.979767 | 1 | 3.301218 | 4.206732 | 2.879293 |
| 6 | -0.23009 | 4.931072 | 1.038318 | 6 | -0.19966 | 4.97567  | 1.058742 |
| 6 | -1.5882  | 4.577387 | 0.927365 | 6 | -1.54816 | 4.583084 | 0.959866 |
| 1 | -2.22093 | 4.522867 | 1.813988 | 1 | -2.1677  | 4.490885 | 1.852478 |
| 6 | -2.15367 | 4.313153 | -0.32198 | 6 | -2.11333 | 4.317471 | -0.28804 |
| 1 | -3.21382 | 4.062779 | -0.3934  | 1 | -3.16539 | 4.035415 | -0.35524 |
| 6 | -1.36919 | 4.373537 | -1.47731 | 6 | -1.33478 | 4.4059   | -1.44658 |
| 1 | -1.8126  | 4.167512 | -2.45283 | 1 | -1.7772  | 4.191216 | -2.42073 |
| 6 | -0.01696 | 4.70655  | -1.37643 | 6 | 0.011584 | 4.768675 | -1.35279 |
| 1 | 0.602002 | 4.763321 | -2.2736  | 1 | 0.622743 | 4.846276 | -2.25365 |
| 6 | 0.550556 | 4.987696 | -0.12987 | 6 | 0.58187  | 5.050998 | -0.10939 |
| 1 | 1.602035 | 5.272355 | -0.07614 | 1 | 1.626544 | 5.358657 | -0.05753 |
| 6 | -0.29482 | 6.865718 | 3.276998 | 6 | -0.30414 | 6.935766 | 3.299067 |
| 6 | -1.52051 | 7.331235 | 2.780749 | 6 | -1.57794 | 7.323288 | 2.857151 |
| 1 | -2.04044 | 6.791833 | 1.989083 | 1 | -2.10555 | 6.74324  | 2.100329 |
| 6 | -2.06663 | 8.527024 | 3.261032 | 6 | -2.16516 | 8.492409 | 3.350628 |
| 1 | -3.0122  | 8.887699 | 2.852154 | 1 | -3.14857 | 8.794487 | 2.986499 |
| 6 | -1.39584 | 9.270138 | 4.234307 | 6 | -1.48962 | 9.283199 | 4.282754 |
| 1 | -1.81651 | 10.21117 | 4.592509 | 1 | -1.94545 | 10.20279 | 4.653292 |
| 6 | -0.16844 | 8.815978 | 4.727596 | 6 | -0.21614 | 8.90524  | 4.72143  |
| 1 | 0.37502  | 9.405014 | 5.468984 | 1 | 0.326091 | 9.531107 | 5.432586 |
| 6 | 0.375751 | 7.619373 | 4.258149 | 6 | 0.372647 | 7.736233 | 4.238257 |
| 1 | 1.352223 | 7.294874 | 4.625052 | 1 | 1.379985 | 7.469458 | 4.565159 |
| 6 | 1.971678 | 2.170845 | 1.969265 | 6 | 2.042343 | 2.117851 | 1.962014 |
| 1 | 1.637867 | 3.050448 | 1.421437 | 1 | 1.786089 | 3.022472 | 1.411808 |
| 6 | 2.74302  | 1.198752 | 1.34123  | 6 | 2.762171 | 1.101077 | 1.352757 |
| 1 | 3.021473 | 1.331991 | 0.295643 | 1 | 3.092004 | 1.219923 | 0.321073 |
| 6 | 3.145531 | 0.078253 | 2.068907 | 6 | 3.035364 | -0.06667 | 2.085174 |
| 1 | 3.759545 | -0.69913 | 1.612712 | 1 | 3.592647 | -0.88957 | 1.636218 |
| 6 | 2.725066 | -0.03747 | 3.390466 | 6 | 2.566972 | -0.16445 | 3.385277 |
| 1 | 2.998275 | -0.9189  | 3.968933 | 1 | 2.746067 | -1.07367 | 3.957721 |
| 6 | 1.937648 | 0.965373 | 3.970698 | 6 | 1.841166 | 0.894772 | 3.965872 |
| 6 | 1.377146 | 0.859616 | 5.325463 | 6 | 1.302113 | 0.856231 | 5.310859 |



|    |          |          |          |    |          |          |          |
|----|----------|----------|----------|----|----------|----------|----------|
| 6  | 1.644822 | -0.20146 | 6.201024 | 6  | 1.547389 | -0.18144 | 6.232732 |
| 1  | 2.336161 | -0.99227 | 5.913046 | 1  | 2.194468 | -1.01248 | 5.954892 |
| 6  | 1.024171 | -0.24659 | 7.44635  | 6  | 0.97663  | -0.14506 | 7.494447 |
| 1  | 1.226568 | -1.06929 | 8.133322 | 1  | 1.16653  | -0.94883 | 8.206832 |
| 6  | 0.141577 | 0.77701  | 7.795436 | 6  | 0.1572   | 0.943508 | 7.844555 |
| 1  | -0.37213 | 0.783398 | 8.7569   | 1  | -0.31962 | 1.008253 | 8.822017 |
| 6  | -0.07529 | 1.811891 | 6.890934 | 6  | -0.04458 | 1.949821 | 6.913332 |
| 1  | -0.74449 | 2.636625 | 7.132288 | 1  | -0.66413 | 2.815219 | 7.144034 |
| 6  | -1.50339 | 1.735715 | 2.641047 | 6  | -1.46243 | 1.666325 | 2.615638 |
| 1  | -0.58098 | 1.425075 | 2.155433 | 1  | -0.53561 | 1.3544   | 2.138833 |
| 6  | -2.72299 | 1.172308 | 2.283629 | 6  | -2.67136 | 1.102829 | 2.259604 |
| 1  | -2.75149 | 0.402057 | 1.512814 | 1  | -2.69762 | 0.323479 | 1.499056 |
| 6  | -3.88535 | 1.612908 | 2.918486 | 6  | -3.8527  | 1.557504 | 2.893455 |
| 1  | -4.8587  | 1.192597 | 2.662709 | 1  | -4.82131 | 1.13101  | 2.630374 |
| 6  | -3.77793 | 2.602038 | 3.892051 | 6  | -3.76302 | 2.543885 | 3.854886 |
| 1  | -4.67094 | 2.960361 | 4.402611 | 1  | -4.66277 | 2.901921 | 4.3541   |
| 6  | -2.52298 | 3.130389 | 4.219791 | 6  | -2.50831 | 3.092898 | 4.205343 |
| 6  | -2.30951 | 4.162984 | 5.237803 | 6  | -2.30443 | 4.096592 | 5.20613  |
| 6  | -3.33933 | 4.754721 | 5.979141 | 6  | -3.32785 | 4.66197  | 6.001761 |
| 1  | -4.3749  | 4.467275 | 5.801627 | 1  | -4.35553 | 4.321792 | 5.879022 |
| 6  | -3.04095 | 5.709689 | 6.946822 | 6  | -3.02809 | 5.631996 | 6.938585 |
| 1  | -3.83721 | 6.174536 | 7.529153 | 1  | -3.81594 | 6.062518 | 7.557553 |
| 6  | -1.70438 | 6.055061 | 7.153055 | 6  | -1.68972 | 6.052894 | 7.085205 |
| 1  | -1.41717 | 6.797064 | 7.898124 | 1  | -1.40833 | 6.813128 | 7.81283  |
| 6  | -0.72159 | 5.444096 | 6.382517 | 6  | -0.71716 | 5.477537 | 6.283848 |
| 1  | 0.329781 | 5.691122 | 6.509244 | 1  | 0.32716  | 5.77163  | 6.369259 |
| 15 | 0.511607 | 5.288352 | 2.705864 | 15 | 0.536421 | 5.397023 | 2.707851 |
| 7  | 2.000863 | 4.230281 | 5.250767 | 7  | 2.048952 | 4.202129 | 5.166619 |
| 6  | 2.929362 | 4.610051 | 5.845255 | 6  | 2.981655 | 4.538959 | 5.775526 |
| 6  | 4.09799  | 5.103499 | 6.542559 | 6  | 4.152364 | 4.969078 | 6.504893 |
| 1  | 4.692898 | 5.741567 | 5.871293 | 1  | 4.786052 | 5.590909 | 5.853907 |
| 1  | 3.807157 | 5.693702 | 7.424207 | 1  | 3.863247 | 5.560083 | 7.386543 |
| 1  | 4.726143 | 4.265296 | 6.878545 | 1  | 4.735016 | 4.097835 | 6.838787 |

**Table S11.** Optimized atomic coordinates (x,y,z) for  $^1\text{GS}$  and  $^3\text{MLCT}$  excited state of **4** using PBE.

| $^1\text{GS}$ |          |          |          | $^3\text{MLCT}$ |          |          |          |
|---------------|----------|----------|----------|-----------------|----------|----------|----------|
| 44            | 0.398999 | 3.483356 | 4.301959 | 44              | 0.387083 | 3.460967 | 4.217609 |
| 7             | 1.58133  | 2.09157  | 3.257821 | 7               | 1.594415 | 2.049757 | 3.22863  |
| 7             | 0.530197 | 1.867185 | 5.679956 | 7               | 0.50758  | 1.930494 | 5.668152 |

|   |          |          |          |   |          |          |          |
|---|----------|----------|----------|---|----------|----------|----------|
| 7 | -1.38638 | 2.701172 | 3.596247 | 7 | -1.35029 | 2.64697  | 3.546791 |
| 7 | -0.98633 | 4.52334  | 5.444813 | 7 | -0.98462 | 4.522794 | 5.36216  |
| 6 | 2.208339 | 5.916687 | 2.283716 | 6 | 2.235342 | 6.012266 | 2.287496 |
| 6 | 2.338094 | 7.181462 | 1.674931 | 6 | 2.37406  | 7.292548 | 1.71272  |
| 1 | 1.455485 | 7.796313 | 1.492169 | 1 | 1.500768 | 7.930757 | 1.570895 |
| 6 | 3.586245 | 7.671825 | 1.296821 | 6 | 3.622245 | 7.765834 | 1.314492 |
| 1 | 3.695139 | 8.649457 | 0.825617 | 1 | 3.740192 | 8.754121 | 0.868341 |
| 6 | 4.714236 | 6.88459  | 1.530728 | 6 | 4.738037 | 6.946269 | 1.491391 |
| 6 | 4.624378 | 5.628646 | 2.128174 | 6 | 4.636303 | 5.672799 | 2.050571 |
| 1 | 5.529904 | 5.041728 | 2.287754 | 1 | 5.531539 | 5.059504 | 2.161294 |
| 6 | 3.365425 | 5.152272 | 2.501215 | 6 | 3.379117 | 5.211815 | 2.444641 |
| 1 | 3.296231 | 4.173195 | 2.971722 | 1 | 3.30046  | 4.215875 | 2.87705  |
| 6 | -0.22576 | 4.933676 | 1.033348 | 6 | -0.20649 | 4.986821 | 1.06271  |
| 6 | -1.58041 | 4.565129 | 0.916855 | 6 | -1.55511 | 4.58653  | 0.970298 |
| 1 | -2.21561 | 4.499785 | 1.800676 | 1 | -2.17026 | 4.493142 | 1.865592 |
| 6 | -2.15026 | 4.297958 | -0.32723 | 6 | -2.13529 | 4.313659 | -0.26527 |
| 1 | -3.20318 | 4.032266 | -0.4289  | 1 | -3.18242 | 4.022226 | -0.35345 |
| 6 | -1.3458  | 4.377001 | -1.46394 | 6 | -1.34405 | 4.40699  | -1.41251 |
| 6 | 0.000497 | 4.725677 | -1.38775 | 6 | 0.000986 | 4.773892 | -1.35506 |
| 1 | 0.597108 | 4.786635 | -2.2988  | 1 | 0.583273 | 4.843369 | -2.27472 |
| 6 | 0.552749 | 5.005479 | -0.13671 | 6 | 0.56618  | 5.058698 | -0.11362 |
| 1 | 1.601386 | 5.299787 | -0.08357 | 1 | 1.610588 | 5.368179 | -0.07097 |
| 6 | -0.30494 | 6.866742 | 3.258681 | 6 | -0.29599 | 6.94614  | 3.29149  |
| 6 | -1.52714 | 7.329693 | 2.748369 | 6 | -1.57453 | 7.33319  | 2.857998 |
| 1 | -2.03656 | 6.790532 | 1.949919 | 1 | -2.10636 | 6.754939 | 2.102975 |
| 6 | -2.09352 | 8.518428 | 3.215747 | 6 | -2.1715  | 8.494417 | 3.349652 |
| 1 | -3.03407 | 8.896266 | 2.812928 | 1 | -3.15596 | 8.816119 | 3.007905 |
| 6 | -1.42268 | 9.241406 | 4.198851 | 6 | -1.47734 | 9.264183 | 4.281626 |
| 6 | -0.19804 | 8.818985 | 4.717018 | 6 | -0.19948 | 8.915444 | 4.723064 |
| 1 | 0.312182 | 9.429542 | 5.463196 | 1 | 0.321663 | 9.559479 | 5.432475 |
| 6 | 0.349097 | 7.626251 | 4.247325 | 6 | 0.380999 | 7.749746 | 4.229479 |
| 1 | 1.322439 | 7.308838 | 4.627701 | 1 | 1.390021 | 7.487247 | 4.553688 |
| 6 | 1.966007 | 2.172315 | 1.960424 | 6 | 2.047957 | 2.120614 | 1.953268 |
| 1 | 1.629296 | 3.051646 | 1.413836 | 1 | 1.790173 | 3.024022 | 1.401802 |
| 6 | 2.734635 | 1.199703 | 1.329975 | 6 | 2.769135 | 1.103785 | 1.346027 |
| 1 | 3.009619 | 1.33151  | 0.283253 | 1 | 3.09922  | 1.220208 | 0.314106 |
| 6 | 3.138712 | 0.079187 | 2.056962 | 6 | 3.043666 | -0.0622  | 2.08112  |
| 1 | 3.750735 | -0.69877 | 1.599047 | 1 | 3.602499 | -0.88514 | 1.634176 |
| 6 | 2.722086 | -0.03582 | 3.379782 | 6 | 2.574544 | -0.15774 | 3.381072 |
| 1 | 2.996441 | -0.91744 | 3.957411 | 1 | 2.755103 | -1.06544 | 3.955481 |
| 6 | 1.937156 | 0.967706 | 3.962417 | 6 | 1.846909 | 0.901658 | 3.959211 |

|    |          |          |          |    |          |          |          |
|----|----------|----------|----------|----|----------|----------|----------|
| 6  | 1.379994 | 0.862127 | 5.318654 | 6  | 1.305776 | 0.864741 | 5.303386 |
| 6  | 1.647055 | -0.20085 | 6.192058 | 6  | 1.544372 | -0.17488 | 6.224747 |
| 1  | 2.335345 | -0.99332 | 5.901369 | 1  | 2.186257 | -1.00982 | 5.946569 |
| 6  | 1.029379 | -0.24606 | 7.438932 | 6  | 0.973376 | -0.13601 | 7.486315 |
| 1  | 1.231275 | -1.07031 | 8.124218 | 1  | 1.158325 | -0.94128 | 8.1983   |
| 6  | 0.150274 | 0.779236 | 7.791575 | 6  | 0.159873 | 0.956824 | 7.836437 |
| 1  | -0.36111 | 0.785552 | 8.754293 | 1  | -0.31677 | 1.023984 | 8.813839 |
| 6  | -0.06621 | 1.815949 | 6.88897  | 6  | -0.03676 | 1.964398 | 6.905432 |
| 1  | -0.73291 | 2.641776 | 7.13334  | 1  | -0.65242 | 2.832433 | 7.13622  |
| 6  | -1.50948 | 1.737957 | 2.654774 | 6  | -1.45778 | 1.660388 | 2.61764  |
| 1  | -0.58906 | 1.419102 | 2.170575 | 1  | -0.53057 | 1.346531 | 2.142686 |
| 6  | -2.73237 | 1.178219 | 2.302445 | 6  | -2.66584 | 1.091776 | 2.266609 |
| 1  | -2.76583 | 0.402415 | 1.537341 | 1  | -2.69143 | 0.306958 | 1.511609 |
| 6  | -3.89184 | 1.629234 | 2.935523 | 6  | -3.84708 | 1.547067 | 2.900075 |
| 1  | -4.86765 | 1.212385 | 2.683367 | 1  | -4.81503 | 1.115889 | 2.642149 |
| 6  | -3.77809 | 2.623176 | 3.903638 | 6  | -3.75783 | 2.539126 | 3.856035 |
| 1  | -4.66871 | 2.98796  | 4.413854 | 1  | -4.65746 | 2.895965 | 4.356412 |
| 6  | -2.51999 | 3.146916 | 4.227146 | 6  | -2.50402 | 3.093864 | 4.200689 |
| 6  | -2.29939 | 4.179331 | 5.244169 | 6  | -2.30107 | 4.103728 | 5.196454 |
| 6  | -3.32497 | 4.775868 | 5.987824 | 6  | -3.32519 | 4.673436 | 5.988066 |
| 1  | -4.36258 | 4.495563 | 5.810666 | 1  | -4.35318 | 4.334212 | 5.864941 |
| 6  | -3.0199  | 5.725399 | 6.958894 | 6  | -3.0262  | 5.646403 | 6.922378 |
| 1  | -3.81272 | 6.19382  | 7.543114 | 1  | -3.81474 | 6.080241 | 7.538181 |
| 6  | -1.68069 | 6.060006 | 7.166724 | 6  | -1.68734 | 6.06516  | 7.071093 |
| 1  | -1.3884  | 6.795476 | 7.916414 | 1  | -1.40619 | 6.824945 | 7.799424 |
| 6  | -0.70258 | 5.445455 | 6.392935 | 6  | -0.71436 | 5.485447 | 6.273292 |
| 1  | 0.350832 | 5.683223 | 6.521789 | 1  | 0.330902 | 5.775877 | 6.361869 |
| 15 | 0.509829 | 5.291581 | 2.701156 | 15 | 0.539077 | 5.406408 | 2.70412  |
| 7  | 2.012051 | 4.227253 | 5.247724 | 7  | 2.053845 | 4.205811 | 5.163062 |
| 6  | 2.941084 | 4.593348 | 5.850294 | 6  | 2.980601 | 4.52734  | 5.789626 |
| 6  | 4.108261 | 5.066609 | 6.564109 | 6  | 4.142093 | 4.935473 | 6.546395 |
| 1  | 4.698891 | 5.735337 | 5.919526 | 1  | 4.781126 | 5.584832 | 5.928491 |
| 1  | 3.815483 | 5.618421 | 7.469711 | 1  | 3.840601 | 5.4905   | 7.447171 |
| 1  | 4.742486 | 4.219518 | 6.864735 | 1  | 4.725279 | 4.054646 | 6.853324 |
| 9  | 5.922243 | 7.350442 | 1.17292  | 9  | 5.943819 | 7.39544  | 1.113302 |
| 9  | -1.96073 | 10.38768 | 4.652742 | 9  | -2.04549 | 10.38269 | 4.758258 |
| 9  | -1.88756 | 4.109276 | -2.66388 | 9  | -1.89376 | 4.130488 | -2.60234 |

**Table S12.** Optimized atomic coordinates (x,y,z) for <sup>1</sup>GS and <sup>3</sup>MLCT excited state of **5** using PBE

| <sup>1</sup> GS |          |          |          | <sup>3</sup> MLCT |          |          |          |
|-----------------|----------|----------|----------|-------------------|----------|----------|----------|
| 44              | 7.076493 | 16.15682 | 2.560078 | 44                | 7.265496 | 16.27626 | 2.678039 |
| 15              | 7.428251 | 17.70799 | 4.375031 | 15                | 7.510932 | 17.91705 | 4.516669 |
| 7               | 8.297575 | 17.25456 | 1.391958 | 7                 | 8.81857  | 17.14502 | 1.653617 |
| 7               | 5.631953 | 15.02839 | 3.53099  | 7                 | 5.591122 | 15.38096 | 3.392345 |
| 7               | 8.62706  | 14.80862 | 3.012631 | 7                 | 8.633513 | 14.7768  | 3.284642 |
| 7               | 6.992117 | 14.80175 | 0.927093 | 7                 | 7.150963 | 14.87505 | 1.066432 |
| 7               | 5.335701 | 17.14523 | 2.001392 | 7                 | 5.803013 | 17.49267 | 1.857006 |
| 9               | 4.552061 | 23.80683 | 3.370073 | 9                 | 3.634283 | 23.49637 | 4.233609 |
| 6               | 8.990419 | 17.83131 | 0.652034 | 6                 | 9.682871 | 17.58818 | 1.0119   |
| 6               | 6.354646 | 19.2276  | 4.281694 | 6                 | 6.212095 | 19.23434 | 4.59011  |
| 6               | 7.167693 | 17.02682 | 6.087115 | 6                 | 7.471364 | 17.12346 | 6.196616 |
| 9               | 3.048843 | 22.96922 | 4.727955 | 9                 | 2.48735  | 22.3803  | 5.731711 |
| 6               | 8.886177 | 13.86104 | 2.053085 | 6                 | 8.889687 | 13.81069 | 2.330649 |
| 6               | 9.111601 | 18.49565 | 4.492691 | 6                 | 9.114116 | 18.85153 | 4.528429 |
| 9               | 3.030817 | 22.42756 | 2.602841 | 9                 | 2.229456 | 21.93809 | 3.599358 |
| 6               | 8.205618 | 17.01402 | 7.033614 | 6                 | 8.478057 | 17.38586 | 7.141359 |
| 9               | 13.07033 | 21.23438 | 5.884998 | 9                 | 12.85052 | 22.11111 | 5.268188 |
| 6               | 6.695244 | 20.20387 | 3.327284 | 6                 | 6.226177 | 20.25681 | 3.624067 |
| 6               | 4.332065 | 15.39214 | 3.286551 | 6                 | 4.39599  | 16.08019 | 3.164552 |
| 6               | 5.922773 | 16.47424 | 6.443275 | 6                 | 6.407616 | 16.27147 | 6.545954 |
| 6               | 10.33486 | 13.81094 | 4.402559 | 6                 | 10.29184 | 13.77365 | 4.721317 |
| 6               | 10.23512 | 17.94894 | 3.854829 | 6                 | 10.3103  | 18.17656 | 4.2261   |
| 6               | 5.717938 | 15.94095 | 7.714247 | 6                 | 6.352449 | 15.69368 | 7.813519 |
| 1               | 4.741677 | 15.53686 | 7.987162 | 1                 | 5.517592 | 15.04487 | 8.082439 |
| 6               | 5.21593  | 19.42159 | 5.074378 | 6                 | 5.21426  | 19.23691 | 5.575753 |
| 6               | 9.336666 | 14.74997 | 4.166175 | 6                 | 9.318465 | 14.72554 | 4.452662 |
| 9               | 13.25884 | 21.05469 | 3.707928 | 9                 | 13.35538 | 21.08188 | 3.397906 |
| 6               | 9.270811 | 19.65293 | 5.276398 | 6                 | 9.172274 | 20.19513 | 4.930155 |
| 6               | 7.999525 | 13.88171 | 0.8809   | 6                 | 8.023738 | 13.81949 | 1.160232 |
| 6               | 5.90488  | 21.33847 | 3.157945 | 6                 | 5.252453 | 21.25197 | 3.63634  |
| 1               | 6.188209 | 22.10132 | 2.430744 | 1                 | 5.278028 | 22.0512  | 2.893881 |
| 6               | 5.863016 | 13.93124 | 4.287274 | 6                 | 5.543495 | 14.16243 | 3.996112 |
| 1               | 6.906592 | 13.68181 | 4.466435 | 1                 | 6.496627 | 13.64947 | 4.113674 |
| 6               | 4.414885 | 20.55405 | 4.89813  | 6                 | 4.231364 | 20.22991 | 5.581507 |
| 6               | 5.260783 | 18.23406 | 1.202278 | 6                 | 5.977606 | 18.47431 | 0.939505 |
| 6               | 4.166613 | 16.58768 | 2.453824 | 6                 | 4.514038 | 17.23047 | 2.32703  |
| 6               | 10.52312 | 20.25357 | 5.41054  | 6                 | 10.39922 | 20.86274 | 4.992217 |
| 6               | 11.63395 | 19.70005 | 4.766216 | 6                 | 11.57817 | 20.18744 | 4.67197  |

|   |          |          |          |   |          |          |          |
|---|----------|----------|----------|---|----------|----------|----------|
| 6 | 11.48982 | 18.54596 | 3.989833 | 6 | 11.53462 | 18.83722 | 4.301295 |
| 6 | 4.751639 | 21.50617 | 3.9338   | 6 | 4.245505 | 21.2318  | 4.609213 |
| 6 | 9.869648 | 18.56153 | -0.23649 | 6 | 10.76483 | 18.15573 | 0.241326 |
| 1 | 9.290093 | 19.1825  | -0.93571 | 1 | 10.37061 | 18.70033 | -0.6298  |
| 1 | 10.48637 | 17.86376 | -0.8222  | 1 | 11.43993 | 17.36325 | -0.11391 |
| 1 | 10.53726 | 19.21546 | 0.345165 | 1 | 11.33729 | 18.85898 | 0.866151 |
| 6 | 8.0065   | 16.46392 | 8.302796 | 6 | 8.423624 | 16.80145 | 8.408492 |
| 9 | 13.98125 | 19.44411 | 5.006151 | 9 | 13.85869 | 20.16529 | 5.323918 |
| 6 | 6.103038 | 14.84966 | -0.08657 | 6 | 6.263264 | 14.92248 | 0.049779 |
| 1 | 5.319921 | 15.60216 | -0.00697 | 1 | 5.591984 | 15.78008 | 0.036395 |
| 6 | 6.169262 | 13.99905 | -1.18589 | 6 | 6.210322 | 13.94946 | -0.93813 |
| 1 | 5.42193  | 14.07822 | -1.97557 | 1 | 5.489856 | 14.04166 | -1.75052 |
| 6 | 10.63313 | 12.876   | 3.410415 | 6 | 10.60733 | 12.82973 | 3.732474 |
| 1 | 11.41629 | 12.13101 | 3.555853 | 1 | 11.38756 | 12.08583 | 3.897658 |
| 6 | 9.890045 | 12.90071 | 2.233995 | 6 | 9.898448 | 12.85263 | 2.540635 |
| 1 | 10.082   | 12.16009 | 1.458866 | 1 | 10.12035 | 12.12186 | 1.763771 |
| 6 | 4.841824 | 13.15481 | 4.823645 | 6 | 4.369824 | 13.61759 | 4.475917 |
| 1 | 5.0926   | 12.28068 | 5.424868 | 1 | 4.389015 | 12.64437 | 4.965197 |
| 6 | 2.924763 | 17.13922 | 2.115667 | 6 | 3.433789 | 18.04329 | 1.903613 |
| 1 | 2.006333 | 16.6886  | 2.489904 | 1 | 2.435501 | 17.86043 | 2.300315 |
| 6 | 3.265837 | 14.64823 | 3.807614 | 6 | 3.184265 | 15.56583 | 3.682491 |
| 6 | 6.763172 | 15.92905 | 8.644852 | 6 | 7.364685 | 15.95307 | 8.74411  |
| 6 | 7.203571 | 13.06411 | -1.25098 | 6 | 7.097149 | 12.86462 | -0.86251 |
| 1 | 7.293061 | 12.38707 | -2.10151 | 1 | 7.074945 | 12.07539 | -1.61513 |
| 6 | 3.516041 | 13.51847 | 4.581911 | 6 | 3.162959 | 14.34942 | 4.333604 |
| 6 | 8.12386  | 13.00811 | -0.20772 | 6 | 7.995369 | 12.79778 | 0.193682 |
| 1 | 8.936855 | 12.28421 | -0.24304 | 1 | 8.666973 | 11.94454 | 0.280338 |
| 6 | 3.844858 | 22.69279 | 3.672082 | 6 | 3.14503  | 22.27561 | 4.556801 |
| 6 | 2.861298 | 18.26514 | 1.299312 | 6 | 3.634984 | 19.04012 | 0.971802 |
| 1 | 1.898555 | 18.70341 | 1.034022 | 1 | 2.801016 | 19.65641 | 0.634506 |
| 6 | 4.054398 | 18.81706 | 0.829933 | 6 | 4.935828 | 19.24598 | 0.455562 |
| 1 | 4.058268 | 19.69787 | 0.187616 | 1 | 5.132466 | 20.00234 | -0.30371 |
| 6 | 12.99599 | 20.36562 | 4.853724 | 6 | 12.91914 | 20.90007 | 4.678713 |
| 6 | 6.54196  | 15.27973 | 9.99876  | 6 | 7.335374 | 15.26047 | 10.09629 |
| 9 | 5.317757 | 15.58315 | 10.49631 | 9 | 8.025607 | 15.95255 | 11.02909 |
| 9 | 6.608386 | 13.92142 | 9.884567 | 9 | 6.065667 | 15.10015 | 10.54068 |
| 9 | 7.47111  | 15.66156 | 10.90195 | 9 | 7.895433 | 14.02199 | 9.998734 |
| 1 | 6.211464 | 18.6377  | 0.861344 | 1 | 6.999136 | 18.625   | 0.592249 |
| 1 | 9.177272 | 17.44782 | 6.795854 | 1 | 9.304201 | 18.05559 | 6.903398 |
| 1 | 9.078652 | 15.48468 | 4.92686  | 1 | 9.050461 | 15.47165 | 5.199547 |
| 1 | 5.095137 | 16.46488 | 5.733811 | 1 | 5.608405 | 16.0608  | 5.836817 |

|   |          |          |          |   |          |          |          |
|---|----------|----------|----------|---|----------|----------|----------|
| 1 | 2.23902  | 14.94876 | 3.602759 | 1 | 2.259981 | 16.12473 | 3.538268 |
| 1 | 10.86689 | 13.82381 | 5.354103 | 1 | 10.79434 | 13.77816 | 5.688416 |
| 1 | 10.13817 | 17.05496 | 3.241668 | 1 | 10.29514 | 17.12444 | 3.941549 |
| 1 | 12.36078 | 18.10955 | 3.49764  | 1 | 12.46089 | 18.30241 | 4.082649 |
| 1 | 4.953348 | 18.71228 | 5.858815 | 1 | 5.202092 | 18.48007 | 6.359543 |
| 1 | 3.536711 | 20.7029  | 5.527897 | 1 | 3.463259 | 20.23107 | 6.355857 |
| 1 | 8.818479 | 16.4672  | 9.031154 | 1 | 9.201899 | 17.01979 | 9.141146 |
| 1 | 7.603352 | 20.09613 | 2.730658 | 1 | 7.01148  | 20.29583 | 2.867768 |
| 1 | 10.63616 | 21.14973 | 6.021915 | 1 | 10.43467 | 21.90824 | 5.300884 |
| 1 | 2.69038  | 12.93154 | 4.986161 | 1 | 2.225245 | 13.9466  | 4.717812 |
| 1 | 8.414664 | 20.09662 | 5.787058 | 1 | 8.265115 | 20.73378 | 5.203272 |

## EC<sub>50</sub> Curves

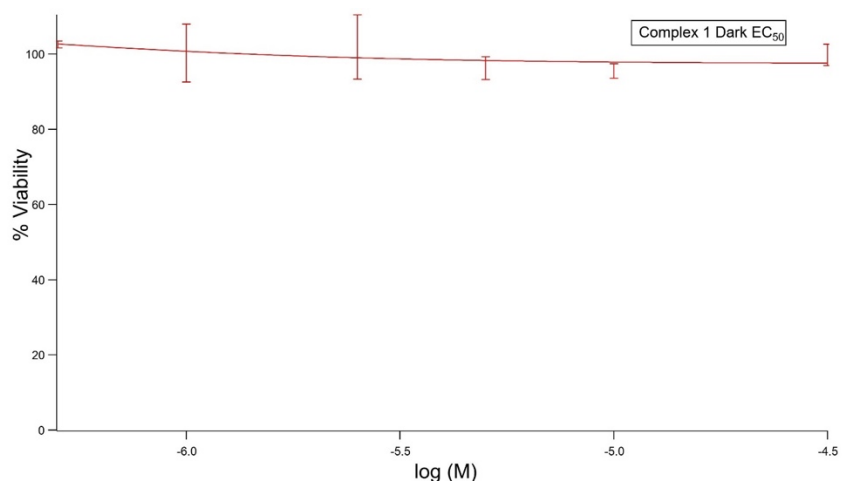

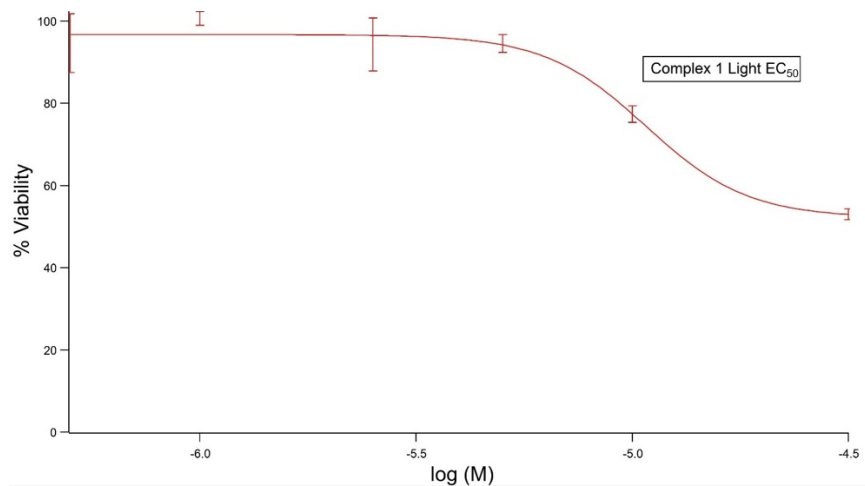

**Figure S13.** EC<sub>50</sub> curves of **1** kept in the dark (top) and upon irradiation (bottom,  $t_{\text{irr}} = 20$  min,  $\lambda_{\text{irr}} = 460\text{--}470$  nm,  $56$  J/cm). Data are representative of three different experiments.

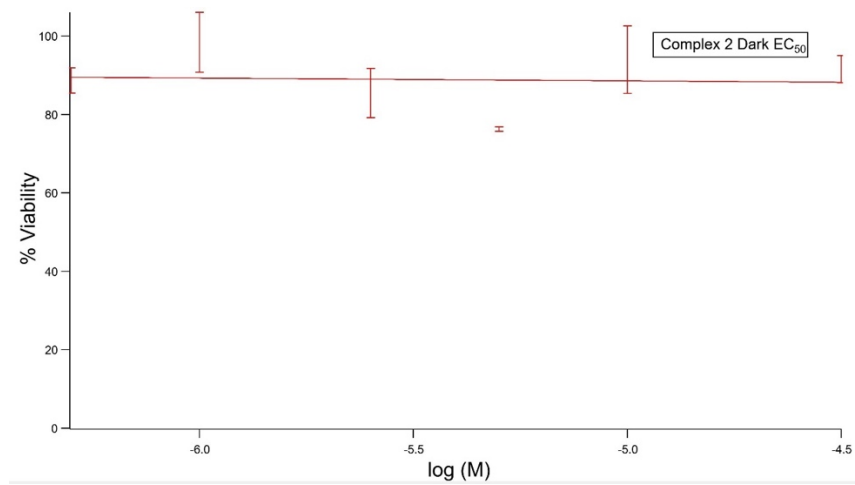

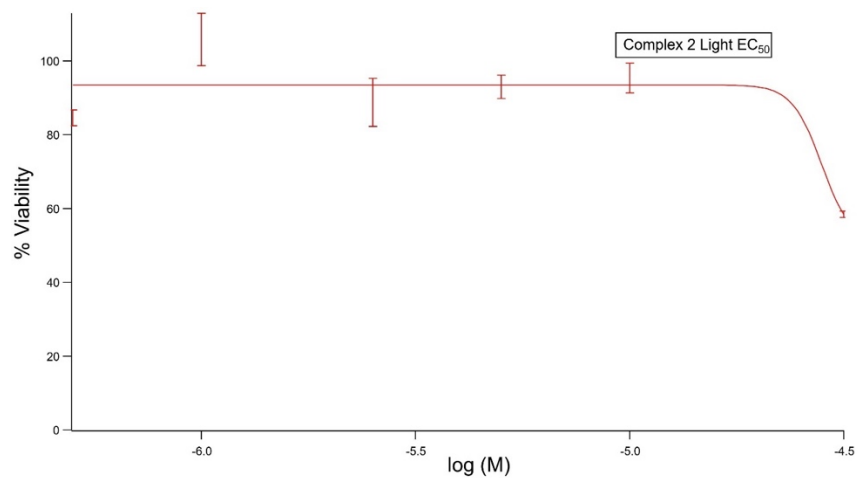

**Figure S14.** EC<sub>50</sub> curves of **2** kept in the dark (top) and upon irradiation (bottom,  $t_{\text{irr}} = 20$  min,  $\lambda_{\text{irr}} = 460\text{--}470$  nm,  $56$  J/cm). Data are representative of three different experiments.



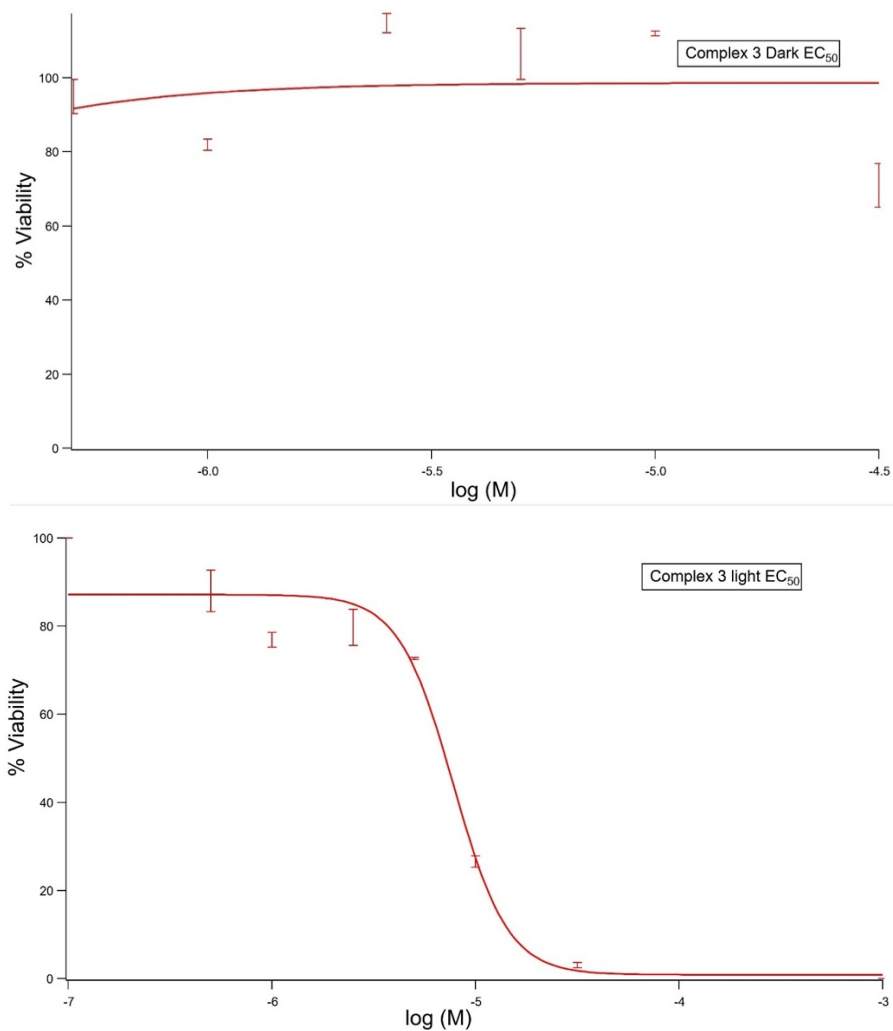

**Figure S15.** EC<sub>50</sub> curves of **3** kept in the dark (top) and upon irradiation (bottom,  $t_{\text{irr}} = 20$  min,  $\lambda_{\text{irr}} = 460\text{--}470$  nm,  $56$  J/cm). Data are representative of three different experiments.

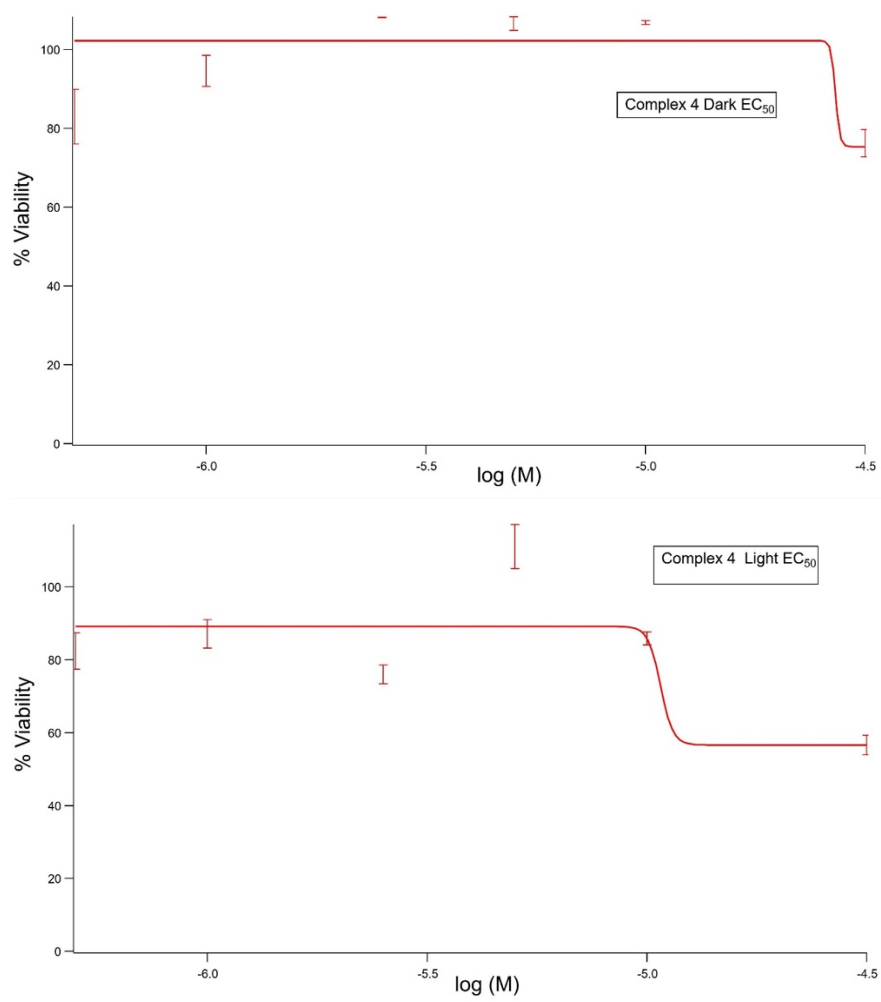

**Figure S16.** EC<sub>50</sub> curves of **4** kept in the dark (top) and upon irradiation (bottom,  $t_{\text{irr}} = 20$  min,  $\lambda_{\text{irr}} = 460\text{--}470$  nm,  $56$  J/cm). Data are representative of three different experiments.

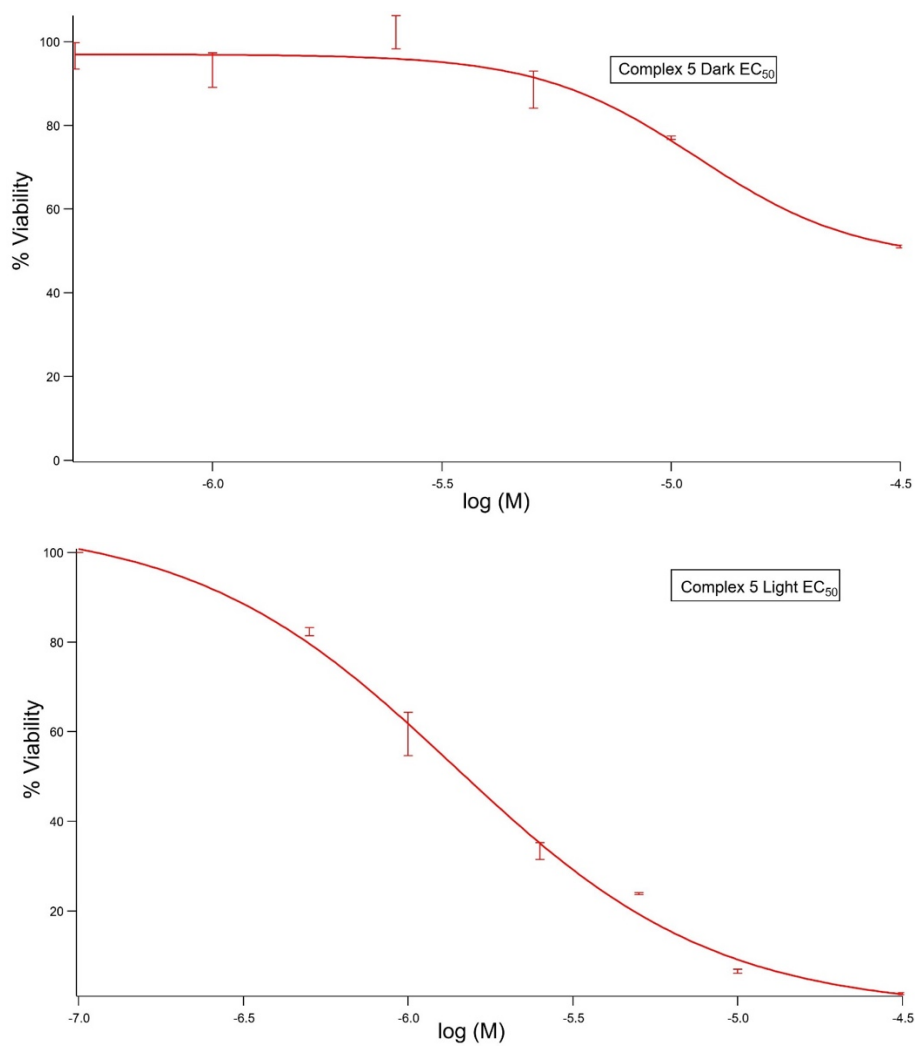

**Figure S17.** EC<sub>50</sub> curves of **5** kept in the dark (top) and upon irradiation (bottom,  $t_{\text{irr}} = 20$  min,  $\lambda_{\text{irr}} = 460\text{--}470$  nm,  $56$  J/cm). Data are representative of three different experiments.

## Cell Death Mechanism Studies

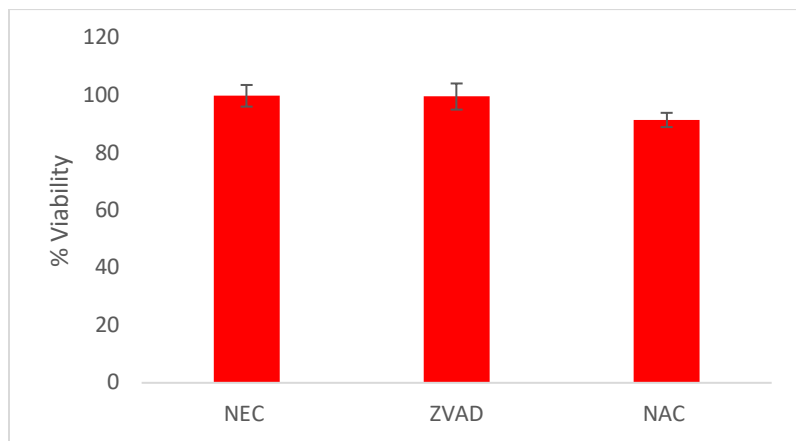

**Figure S18.** Viability of MDA-MB-231 cells when treated with necrostatin (NEC), ZVAD-FMK (ZVAD) or N-acetyl cysteine (NAC) followed by irradiation ( $t_{\text{irr}} = 20$  min,  $\lambda_{\text{irr}} = 460\text{--}470$  nm,  $56$  J/cm<sup>2</sup>). Data are representative of three different experiments.

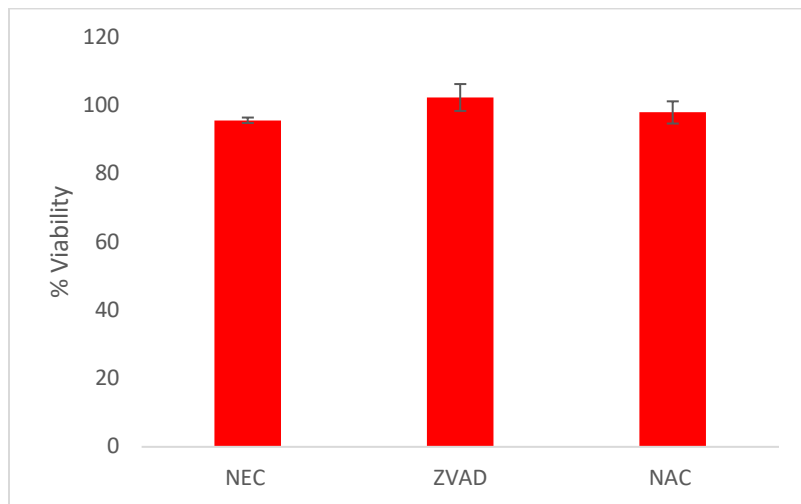

**Figure S19.** Viability of MDA-MB-231 cells when treated with necrostatin (NEC), ZVAD-FMK (ZVAD) or N-acetyl cysteine (NAC) and kept in the dark. Data are representative of three different experiments

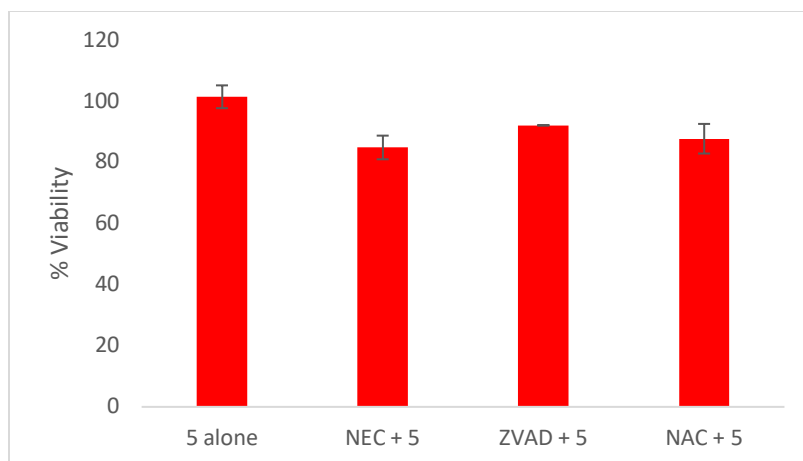

**Figure S20.** Viability of MDA-MB-231 cells when treated with complex **5** (2  $\mu$ M) alone and co-treated with Necrostatin (NEC), Z-VAD-FMK (ZVAD), N-Acetyl Cysteine (NAC) and complex **5** (2  $\mu$ M) and kept in the dark. Data are representative of three different experiments.
